# Supplementary material
Source: PubMed Central journal article supplement (PMC2048770)
Supplement: plntphys_pp.107.104455_1.pdf [file plntphys_pp.107.104455_1.pdf]

## Supplementary Table S1. Fahnenstich et al., 2007

Complete dataset of starch and soluble sugars measured by end point enzymatic assays over a long-day diurnal cycle and dark-induced senescence. The results of one typical experiment from three biological replicates are presented and given as the mean  $\pm$  SE (n= 4). For each compound the values are relative to the wild-type one at the end of the night period (t = 0) that was set to 1. n.d. indicates compounds that were not detected.

| t in h | wt<br>Glucose |              | MEm2<br>Glucose |              | MEm4<br>Glucose |              | MEm5<br>Glucose |              |
|--------|---------------|--------------|-----------------|--------------|-----------------|--------------|-----------------|--------------|
|        | Mean          | SE           | Mean            | SE           | Mean            | SE           | Mean            | SE           |
| 0      | 1             | $\pm$ 0.0922 | 0.9874          | $\pm$ 0.0405 | 1.1202          | $\pm$ 0.1000 | 0.8958          | $\pm$ 0.0709 |
| 1      | 1.7381        | $\pm$ 0.1200 | 1.4607          | $\pm$ 0.2975 | 1.8372          | $\pm$ 0.6413 | 1.6465          | $\pm$ 0.0923 |
| 3      | 1.6867        | $\pm$ 0.0496 | 1.8454          | $\pm$ 0.0531 | 1.8557          | $\pm$ 0.0535 | 1.5612          | $\pm$ 0.0668 |
| 4      | 2.6163        | $\pm$ 0.0689 | <b>2.0982</b>   | $\pm$ 0.1093 | <b>2.0139</b>   | $\pm$ 0.1183 | <b>3.1077</b>   | $\pm$ 0.0741 |
| 7      | 1.3694        | $\pm$ 0.0338 | 1.4420          | $\pm$ 0.1468 | 1.0213          | $\pm$ 0.1354 | 1.4956          | $\pm$ 0.1075 |
| 11     | 1.2861        | $\pm$ 0.0915 | 1.4862          | $\pm$ 0.1672 | <b>0.9137</b>   | $\pm$ 0.0268 | 1.0983          | $\pm$ 0.0859 |
| 13     | 1.5669        | $\pm$ 0.2080 | 2.0576          | $\pm$ 0.5543 | 1.0550          | $\pm$ 0.0522 | 1.8316          | $\pm$ 0.9688 |
| 15     | 1.2924        | $\pm$ 0.0512 | 1.2157          | $\pm$ 0.0791 | 1.2916          | $\pm$ 0.1391 | 1.2264          | $\pm$ 0.0357 |
| 15.5   | 1.4120        | $\pm$ 0.1379 | 1.3865          | $\pm$ 0.1415 | 1.6975          | $\pm$ 0.2577 | <b>2.4153</b>   | $\pm$ 0.2660 |
| 17     | 1.4766        | $\pm$ 0.2803 | 1.9381          | $\pm$ 0.1482 | 1.0496          | $\pm$ 0.1800 | <b>0.4189</b>   | $\pm$ 0.1677 |
| 19     | 6.8880        | $\pm$ 0.4004 | <b>1.3997</b>   | $\pm$ 0.0805 | <b>1.4174</b>   | $\pm$ 0.3609 | <b>1.9210</b>   | $\pm$ 0.1087 |
| 21     | 5.2957        | $\pm$ 0.7187 | <b>1.1141</b>   | $\pm$ 0.3455 | <b>1.2111</b>   | $\pm$ 0.3036 | 3.8908          | $\pm$ 2.2368 |
| 24     | 0.7955        | $\pm$ 0.0102 | <b>0.9270</b>   | $\pm$ 0.0255 | 0.8680          | $\pm$ 0.0437 | 0.7381          | $\pm$ 0.0210 |
| 27     | 0.9872        | $\pm$ 0.0294 | 0.9324          | $\pm$ 0.0383 | 1.0260          | $\pm$ 0.0569 | <b>1.4780</b>   | $\pm$ 0.0520 |
| 31     | 0.7406        | $\pm$ 0.0320 | 0.7341          | $\pm$ 0.0059 | <b>0.9649</b>   | $\pm$ 0.0400 | <b>1.2358</b>   | $\pm$ 0.0376 |
| 35     | 0.9878        | $\pm$ 0.0408 | 1.0246          | $\pm$ 0.0131 | 1.0865          | $\pm$ 0.0898 | 0.9580          | $\pm$ 0.0166 |
| 39     | 0.8599        | $\pm$ 0.0176 | 0.8933          | $\pm$ 0.0154 | 0.8107          | $\pm$ 0.0157 | <b>1.0409</b>   | $\pm$ 0.0176 |
| 48     | 0.5932        | $\pm$ 0.0165 | 0.5447          | $\pm$ 0.0230 | 0.6073          | $\pm$ 0.0335 | <b>0.8790</b>   | $\pm$ 0.0565 |
| 55     | 1.0222        | $\pm$ 0.1005 | 0.6389          | $\pm$ 0.0555 | <b>0.5353</b>   | $\pm$ 0.0071 | <b>0.6417</b>   | $\pm$ 0.0312 |
| 59     | 0.6904        | $\pm$ 0.0801 | 0.6206          | $\pm$ 0.0179 | 0.5900          | $\pm$ 0.0578 | 0.7347          | $\pm$ 0.0808 |
| 63     | 0.8956        | $\pm$ 0.0491 | <b>0.4831</b>   | $\pm$ 0.0848 | <b>0.3585</b>   | $\pm$ 0.0346 | 0.8125          | $\pm$ 0.0098 |

| t in h | wt<br>Fructose |              | MEm2<br>Fructose |              | MEm4<br>Fructose |              | MEm5<br>Fructose |              |
|--------|----------------|--------------|------------------|--------------|------------------|--------------|------------------|--------------|
|        | Mean           | SE           | Mean             | SE           | Mean             | SE           | Mean             | SE           |
| 0      | 1              | $\pm$ 0.1111 | 1.1297           | $\pm$ 0.1129 | 1.3272           | $\pm$ 0.3660 | 1.4856           | $\pm$ 0.2357 |
| 1      | 5.4291         | $\pm$ 1.1037 | 2.5459           | $\pm$ 1.6494 | 2.4990           | $\pm$ 0.9543 | 2.9612           | $\pm$ 0.3083 |
| 3      | 4.1095         | $\pm$ 0.0515 | 3.7274           | $\pm$ 0.2542 | <b>4.6929</b>    | $\pm$ 0.1530 | <b>3.7447</b>    | $\pm$ 0.0546 |
| 4      | 6.4169         | $\pm$ 0.5292 | <b>4.9939</b>    | $\pm$ 0.1412 | 5.8743           | $\pm$ 0.3151 | <b>8.0811</b>    | $\pm$ 0.2785 |
| 7      | 1.9182         | $\pm$ 0.2282 | 1.9884           | $\pm$ 0.0530 | 1.8150           | $\pm$ 0.1299 | 1.3351           | $\pm$ 0.0826 |
| 11     | 1.8719         | $\pm$ 0.1328 | 2.1501           | $\pm$ 0.2841 | 2.0290           | $\pm$ 0.3397 | 1.7594           | $\pm$ 0.1877 |
| 13     | 3.5605         | $\pm$ 0.5636 | <b>5.7030</b>    | $\pm$ 0.2798 | 4.2406           | $\pm$ 0.4951 | 3.1819           | $\pm$ 1.6592 |
| 15     | 2.1413         | $\pm$ 0.1479 | 1.8645           | $\pm$ 0.2229 | 2.0938           | $\pm$ 0.1441 | 2.2403           | $\pm$ 0.3194 |
| 15.5   | 3.4716         | $\pm$ 0.7600 | 4.9402           | $\pm$ 0.5455 | 4.1882           | $\pm$ 2.1284 | 5.4922           | $\pm$ 0.8924 |
| 17     | 4.1136         | $\pm$ 2.1084 | 3.1379           | $\pm$ 1.6262 | 2.7540           | $\pm$ 0.2514 | 0.9542           | $\pm$ 0.9200 |
| 19     | 11.2306        | $\pm$ 0.5340 | <b>3.6323</b>    | $\pm$ 0.3243 | <b>3.9664</b>    | $\pm$ 0.3149 | <b>3.4822</b>    | $\pm$ 1.3029 |
| 21     | 7.4302         | $\pm$ 1.9400 | <b>1.5219</b>    | $\pm$ 0.4139 | 3.5671           | $\pm$ 0.3687 | 3.6884           | $\pm$ 2.4095 |
| 24     | 0.8342         | $\pm$ 0.0922 | 0.9377           | $\pm$ 0.1278 | <b>0.3710</b>    | $\pm$ 0.0873 | 0.8737           | $\pm$ 0.0461 |
| 27     | 0.2384         | $\pm$ 0.0601 | <b>1.1509</b>    | $\pm$ 0.0793 | <b>1.4042</b>    | $\pm$ 0.1019 | <b>1.3147</b>    | $\pm$ 0.0894 |
| 31     | 0.2075         | $\pm$ 0.0866 | 0.5046           | $\pm$ 0.0236 | <b>0.7586</b>    | $\pm$ 0.1029 | <b>0.7985</b>    | $\pm$ 0.1262 |
| 35     | 0.2102         | $\pm$ 0.0782 | 0.0416           | $\pm$ 0.0650 | 0.0269           | $\pm$ 0.0733 | 0.0039           | $\pm$ 0.0477 |
| 39     | 0.3956         | $\pm$ 0.0827 | 0.4774           | $\pm$ 0.0494 | 0.7589           | $\pm$ 0.0980 | 0.0701           | $\pm$ 0.0594 |
| 48     | n.d.           | $\pm$ n.d.   | 0.1542           | $\pm$ 0.0482 | 0.3718           | $\pm$ 0.1844 | 0.0467           | $\pm$ 0.0630 |
| 55     | n.d.           | $\pm$ n.d.   | n.d.             | $\pm$ n.d.   | n.d.             | $\pm$ n.d.   | 0.4022           | $\pm$ 0.4623 |
| 59     | 0.0802         | $\pm$ 0.2582 | n.d.             | $\pm$ n.d.   | n.d.             | $\pm$ n.d.   | 0.1792           | $\pm$ 0.2062 |
| 63     | 0.0700         | $\pm$ 0.0853 | 0.0085           | $\pm$ 0.0496 | n.d.             | $\pm$ n.d.   | n.d.             | $\pm$ n.d.   |

| t in h | wt<br>Sucrose |          | MEM2<br>Sucrose |          | MEM4<br>Sucrose |          | MEM5<br>Sucrose |          |
|--------|---------------|----------|-----------------|----------|-----------------|----------|-----------------|----------|
|        | Mean          | SE       | Mean            | SE       | Mean            | SE       | Mean            | SE       |
| 0      | 1             | ± 0.0697 | <b>1.2868</b>   | ± 0.0085 | 0.9531          | ± 0.0173 | 1.2849          | ± 0.0478 |
| 1      | 1.7181        | ± 0.1173 | 1.3163          | ± 0.2145 | 1.8714          | ± 0.3990 | 1.8379          | ± 0.0606 |
| 3      | 1.4924        | ± 0.0583 | 1.4369          | ± 0.0723 | 1.5346          | ± 0.0930 | 1.2577          | ± 0.1307 |
| 4      | 1.9909        | ± 0.0276 | 1.6937          | ± 0.1221 | 1.7985          | ± 0.0746 | <b>1.7786</b>   | ± 0.0404 |
| 7      | 1.2510        | ± 0.1089 | 1.5023          | ± 0.0197 | 1.2190          | ± 0.0726 | 1.5207          | ± 0.0313 |
| 11     | 1.4668        | ± 0.0205 | <b>1.9367</b>   | ± 0.1023 | 1.6041          | ± 0.1189 | 1.5497          | ± 0.0150 |
| 13     | 1.6196        | ± 0.2029 | 2.4330          | ± 0.6524 | 1.8314          | ± 0.0329 | 1.9051          | ± 0.7943 |
| 15     | 1.7790        | ± 0.0314 | <b>2.0516</b>   | ± 0.0518 | 2.0264          | ± 0.0882 | 1.9800          | ± 0.1608 |
| 15.5   | 2.3410        | ± 0.0530 | <b>1.8409</b>   | ± 0.0376 | <b>2.0910</b>   | ± 0.0626 | <b>1.8455</b>   | ± 0.1610 |
| 17     | 1.5921        | ± 0.0588 | 1.5023          | ± 0.0592 | <b>1.0402</b>   | ± 0.0800 | <b>0.5953</b>   | ± 0.2255 |
| 19     | 2.1133        | ± 0.1851 | 1.7325          | ± 0.2394 | <b>1.2269</b>   | ± 0.0658 | 1.6957          | ± 0.2003 |
| 21     | 1.4930        | ± 0.2199 | 1.3673          | ± 0.0412 | 1.5778          | ± 0.2699 | 1.5770          | ± 0.1175 |
| 24     | 0.8161        | ± 0.0030 | <b>1.2695</b>   | ± 0.0074 | <b>0.9107</b>   | ± 0.0093 | <b>1.1669</b>   | ± 0.0247 |
| 27     | 0.2675        | ± 0.0184 | <b>0.8166</b>   | ± 0.0038 | <b>0.6614</b>   | ± 0.0061 | <b>0.9391</b>   | ± 0.0035 |
| 31     | 0.0969        | ± 0.0036 | <b>0.2484</b>   | ± 0.0025 | <b>0.3417</b>   | ± 0.0095 | <b>0.4473</b>   | ± 0.0037 |
| 35     | 0.1160        | ± 0.0074 | <b>0.1447</b>   | ± 0.0025 | <b>0.2049</b>   | ± 0.0098 | <b>0.2269</b>   | ± 0.0015 |
| 39     | 0.1000        | ± 0.0025 | <b>0.1607</b>   | ± 0.0019 | 0.1188          | ± 0.0064 | <b>0.1597</b>   | ± 0.0064 |
| 48     | 0.0612        | ± 0.0018 | 0.0617          | ± 0.0099 | <b>0.1113</b>   | ± 0.0044 | <b>0.1408</b>   | ± 0.0039 |
| 55     | 0.0180        | ± 0.0024 | <b>0.1018</b>   | ± 0.0042 | <b>0.0750</b>   | ± 0.0082 | <b>0.0780</b>   | ± 0.0018 |
| 59     | 0.0309        | ± 0.0075 | <b>0.0725</b>   | ± 0.0015 | <b>0.0620</b>   | ± 0.0042 | 0.0469          | ± 0.0026 |
| 63     | 0.0489        | ± 0.0084 | 0.0651          | ± 0.0146 | 0.0505          | ± 0.0068 | 0.0792          | ± 0.0063 |

| t in h | wt<br>Starch |          | MEM2<br>Starch |          | MEM4<br>Starch |          | MEM5<br>Starch |          |
|--------|--------------|----------|----------------|----------|----------------|----------|----------------|----------|
|        | Mean         | SE       | Mean           | SE       | Mean           | SE       | Mean           | SE       |
| 0      | 1            | ± 0.1854 | 1.4168         | ± 0.0504 | 1.3632         | ± 0.2256 | 0.9646         | ± 0.1296 |
| 1      | 1.6661       | ± 0.1235 | 1.3084         | ± 0.1874 | 2.8873         | ± 1.3699 | <b>2.4659</b>  | ± 0.0752 |
| 3      | 1.1490       | ± 0.0749 | <b>1.7239</b>  | ± 0.1427 | <b>1.8501</b>  | ± 0.0828 | 1.1926         | ± 0.1123 |
| 4      | 1.6540       | ± 0.0352 | 2.0269         | ± 0.2523 | 2.0829         | ± 0.2733 | 2.6143         | ± 0.5740 |
| 7      | 2.0309       | ± 0.0712 | <b>2.6080</b>  | ± 0.0864 | <b>2.8848</b>  | ± 0.1404 | <b>2.5729</b>  | ± 0.0604 |
| 11     | 3.6141       | ± 0.0830 | <b>4.1122</b>  | ± 0.1126 | <b>4.3660</b>  | ± 0.1102 | 3.7940         | ± 0.1121 |
| 13     | 3.8419       | ± 0.5443 | 4.4080         | ± 1.2115 | 3.4917         | ± 0.1890 | 5.1410         | ± 2.3074 |
| 15     | 4.7200       | ± 0.0769 | 5.0900         | ± 0.2128 | <b>4.1197</b>  | ± 0.1179 | 4.2873         | ± 0.3334 |
| 15.5   | 4.6953       | ± 0.1126 | 4.4283         | ± 0.2105 | 4.5690         | ± 0.1774 | 5.5261         | ± 0.3527 |
| 17     | 4.3458       | ± 0.1617 | 4.5594         | ± 0.1421 | <b>3.5477</b>  | ± 0.2745 | 3.0871         | ± 1.0866 |
| 19     | 3.7503       | ± 1.4507 | 3.1965         | ± 0.1888 | 2.4796         | ± 0.1567 | 5.9115         | ± 0.9589 |
| 21     | 2.0956       | ± 0.3184 | 2.7649         | ± 0.0811 | 3.0164         | ± 0.6225 | <b>3.2997</b>  | ± 0.1880 |
| 24     | 1.0000       | ± 0.1854 | 1.4168         | ± 0.0504 | 1.3632         | ± 0.2256 | 0.9646         | ± 0.1296 |
| 27     | 0.4889       | ± 0.0504 | <b>0.2637</b>  | ± 0.0259 | 0.6452         | ± 0.0272 | 0.4596         | ± 0.0381 |
| 31     | 0.0831       | ± 0.0090 | 0.1067         | ± 0.0034 | <b>0.2866</b>  | ± 0.0094 | 0.0759         | ± 0.0221 |
| 35     | 0.0746       | ± 0.0107 | 0.0464         | ± 0.0089 | <b>0.2179</b>  | ± 0.0120 | 0.0722         | ± 0.0201 |
| 39     | 0.1042       | ± 0.0184 | 0.0876         | ± 0.0034 | 0.1160         | ± 0.0138 | 0.1216         | ± 0.0052 |
| 48     | 0.0373       | ± 0.0027 | 0.0272         | ± 0.0050 | 0.0278         | ± 0.0044 | 0.0303         | ± 0.0071 |
| 55     | 0.0251       | ± 0.0015 | <b>0.0154</b>  | ± 0.0020 | 0.0256         | ± 0.0004 | <b>0.0152</b>  | ± 0.0012 |
| 59     | 0.0173       | ± 0.0031 | 0.0175         | ± 0.0030 | 0.0141         | ± 0.0011 | 0.0124         | ± 0.0028 |
| 63     | 0.0253       | ± 0.0018 | 0.0254         | ± 0.0019 | 0.0239         | ± 0.0056 | <b>0.0148</b>  | ± 0.0004 |

**Supplementary Table S2. Fahrenstich et al., 2007**

Complete dataset of metabolites of rosettes over a long-day diurnal cycle. For each compound the values are relative to the wild-type one at the end of the night period (t = 0) that was set to 1. All values are presented as the mean ± SE of replicates of five plants each. Those that are significantly different from the respective wild-type as determined by the Student's t test (p<0.05) are set into bold type. n.d. indicates compounds that were not detected.

| Substance            | t in h | wt       |            | MEm2             |            | MEm4             |            | MEm5            |            |
|----------------------|--------|----------|------------|------------------|------------|------------------|------------|-----------------|------------|
|                      |        | Mean     | SE         | Mean             | SE         | Mean             | SE         | Mean            | SE         |
| 2-Oxoglutarat        | 0      | 1        | ± 0,008169 | 1,212551         | ± n.d.     | n.d.             | ± n.d.     | 1,100640        | ± n.d.     |
| 2-Oxoglutarat        | 3      | 3,899672 | ± 0,350282 | <b>5,981523</b>  | ± 0,540113 | <b>5,052608</b>  | ± 0,483131 | 4,253615        | ± 0,356043 |
| 2-Oxoglutarat        | 7      | 4,000100 | ± 1,003742 | 5,093782         | ± 0,213790 | 2,653180         | ± 0,242727 | 3,739502        | ± 0,454366 |
| 2-Oxoglutarat        | 11     | 2,105945 | ± 0,526880 | <b>4,196804</b>  | ± 0,283641 | <b>3,868799</b>  | ± 0,341831 | <b>3,877680</b> | ± 0,264822 |
| 2-Oxoglutarat        | 15     | 3,428175 | ± 0,347105 | <b>4,055994</b>  | ± 0,276741 | <b>4,517741</b>  | ± 0,456366 | <b>6,631165</b> | ± 0,395463 |
| 2-Oxoglutarat        | 17     | 1,511505 | ± 0,312223 | 1,016510         | ± 0,196796 | 3,042294         | ± 0,589622 | <b>2,691065</b> | ± 0,311085 |
| 2-Oxoglutarat        | 19     | 2,346988 | ± 0,542001 | <b>0,962587</b>  | ± 0,061145 | 1,478202         | ± 0,181524 | 3,461337        | ± 0,528841 |
| 2-Oxoglutarat        | 24     | 1        | ± 0,008169 | 1,212551         | ± n.d.     | n.d.             | ± n.d.     | 1,100640        | ± n.d.     |
| 3-PGA                | 0      | 1        | ± 0,096385 | 0,978747         | ± 0,098358 | 1,108037         | ± 0,090369 | <b>1,287880</b> | ± 0,115825 |
| 3-PGA                | 3      | 1,477243 | ± 0,069202 | <b>1,840531</b>  | ± 0,128973 | <b>2,294413</b>  | ± 0,238628 | <b>2,066691</b> | ± 0,230785 |
| 3-PGA                | 7      | 1,694253 | ± 0,169594 | <b>2,105890</b>  | ± 0,104220 | 1,920570         | ± 0,117635 | <b>2,082571</b> | ± 0,075169 |
| 3-PGA                | 11     | 1,470735 | ± 0,230272 | <b>1,989676</b>  | ± 0,075037 | <b>2,198288</b>  | ± 0,161724 | <b>2,282984</b> | ± 0,026034 |
| 3-PGA                | 15     | 2,346629 | ± 0,222260 | 2,462242         | ± 0,131073 | 2,397158         | ± 0,122588 | <b>2,984838</b> | ± 0,177342 |
| 3-PGA                | 17     | 2,872919 | ± 0,167452 | 2,699473         | ± 0,061833 | 3,312138         | ± 0,198012 | 3,726440        | ± 0,410620 |
| 3-PGA                | 19     | 2,982450 | ± 0,119447 | 3,375888         | ± 0,217410 | 2,730393         | ± 0,058884 | 3,219273        | ± 0,124040 |
| 3-PGA                | 24     | 1        | ± 0,096385 | 0,978747         | ± 0,098358 | 1,108037         | ± 0,090369 | <b>1,287880</b> | ± 0,115825 |
| 5-Oxo-Proline        | 0      | 1        | ± 0,074007 | 0,828553         | ± 0,152564 | <b>0,664642</b>  | ± 0,129903 | <b>0,512699</b> | ± 0,093623 |
| 5-Oxo-Proline        | 3      | 1,859058 | ± 0,134613 | 1,714035         | ± 0,194703 | 1,779809         | ± 0,124002 | 1,824139        | ± 0,169202 |
| 5-Oxo-Proline        | 7      | 1,587293 | ± 0,192232 | 1,481587         | ± 0,050137 | <b>1,088231</b>  | ± 0,074569 | 1,490363        | ± 0,122894 |
| 5-Oxo-Proline        | 11     | 1,283629 | ± 0,188479 | <b>1,670204</b>  | ± 0,064441 | <b>1,667454</b>  | ± 0,123699 | <b>1,639320</b> | ± 0,107170 |
| 5-Oxo-Proline        | 15     | 1,804103 | ± 0,142089 | 1,685661         | ± 0,066654 | 2,039764         | ± 0,135254 | <b>2,465460</b> | ± 0,125317 |
| 5-Oxo-Proline        | 17     | 1,922587 | ± 0,092133 | 1,591745         | ± 0,121076 | 1,839945         | ± 0,030484 | <b>1,272878</b> | ± 0,089150 |
| 5-Oxo-Proline        | 19     | 1,906244 | ± 0,091547 | <b>1,197845</b>  | ± 0,036057 | <b>1,305188</b>  | ± 0,019123 | <b>1,396702</b> | ± 0,012666 |
| 5-Oxo-Proline        | 24     | 1        | ± 0,074007 | 0,828553         | ± 0,152564 | <b>0,664642</b>  | ± 0,129903 | <b>0,512699</b> | ± 0,093623 |
| Alanine              | 0      | 1        | ± 0,075282 | <b>2,574213</b>  | ± 0,224586 | <b>3,890862</b>  | ± 0,434880 | <b>4,681969</b> | ± 0,396785 |
| Alanine              | 3      | 0,725138 | ± 0,122750 | <b>1,794691</b>  | ± 0,177862 | <b>2,782424</b>  | ± 0,382783 | <b>7,736187</b> | ± 1,252094 |
| Alanine              | 7      | 1,275738 | ± 0,369444 | <b>3,826498</b>  | ± 0,739351 | <b>5,899192</b>  | ± 1,323416 | <b>9,019547</b> | ± 1,823506 |
| Alanine              | 11     | 0,861462 | ± 0,248111 | <b>2,718912</b>  | ± 0,300026 | <b>4,138588</b>  | ± 0,505182 | <b>5,224994</b> | ± 0,437810 |
| Alanine              | 15     | 1,523045 | ± 0,453899 | 3,159627         | ± 0,809679 | <b>5,113242</b>  | ± 0,983707 | <b>8,793130</b> | ± 1,281537 |
| Alanine              | 17     | 3,823398 | ± 0,532973 | <b>11,863508</b> | ± 0,723099 | <b>14,337653</b> | ± 0,706776 | <b>9,46172</b>  | ± 0,116930 |
| Alanine              | 19     | 0,997975 | ± 0,100797 | <b>4,586447</b>  | ± 1,175190 | <b>8,648680</b>  | ± 1,759079 | <b>7,860489</b> | ± 0,536334 |
| Alanine              | 24     | 1        | ± 0,075282 | <b>2,574213</b>  | ± 0,224586 | <b>3,890862</b>  | ± 0,434880 | <b>4,681969</b> | ± 0,396785 |
| Ascorbate            | 0      | 1        | ± 0,126173 | <b>2,105897</b>  | ± 0,200454 | <b>2,283151</b>  | ± 0,417674 | <b>2,300985</b> | ± 0,384632 |
| Ascorbate            | 3      | 1,813963 | ± 0,261456 | <b>5,968866</b>  | ± 1,320792 | <b>4,258722</b>  | ± 0,501245 | <b>7,042026</b> | ± 1,792056 |
| Ascorbate            | 7      | 4,011958 | ± 1,525655 | 2,688045         | ± 0,137314 | 2,826970         | ± 0,140427 | 2,024653        | ± 0,154140 |
| Ascorbate            | 11     | 1,023409 | ± 0,149031 | <b>2,263991</b>  | ± 0,332995 | <b>2,155123</b>  | ± 0,292825 | <b>1,860405</b> | ± 0,115275 |
| Ascorbate            | 15     | 1,093543 | ± 0,149379 | <b>2,108629</b>  | ± 0,269720 | <b>1,922236</b>  | ± 0,267225 | <b>2,076569</b> | ± 0,181140 |
| Ascorbate            | 17     | 1,207993 | ± 0,104519 | 1,001590         | ± 0,187778 | 1,349357         | ± 0,159683 | <b>2,195137</b> | ± 0,304598 |
| Ascorbate            | 19     | 1,491900 | ± 0,200460 | 1,780669         | ± 0,196761 | 1,772833         | ± 0,261266 | 2,188838        | ± 0,241145 |
| Ascorbate            | 24     | 1        | ± 0,126173 | <b>2,105897</b>  | ± 0,200454 | <b>2,283151</b>  | ± 0,417674 | <b>2,300985</b> | ± 0,384632 |
| Asparagine           | 0      | 1        | ± 0,023495 | <b>1,210446</b>  | ± 0,052176 | 0,780985         | ± n.d.     | 1,020384        | ± 0,028513 |
| Asparagine           | 3      | 2,593887 | ± 0,552235 | 0,952540         | ± n.d.     | 1,599113         | ± 0,089039 | 1,587192        | ± 0,055117 |
| Asparagine           | 7      | 2,811349 | ± 0,503470 | 1,390658         | ± n.d.     | <b>1,122042</b>  | ± 0,007159 | 1,549846        | ± n.d.     |
| Asparagine           | 11     | n.d.     | ± n.d.     | 1,555375         | ± 0,045355 | 1,443768         | ± 0,135222 | 1,568655        | ± 0,149342 |
| Asparagine           | 15     | 2,340797 | ± n.d.     | 1,524208         | ± 0,150386 | n.d.             | ± n.d.     | 1,743477        | ± 0,164528 |
| Asparagine           | 17     | 1,621594 | ± 0,210321 | <b>0,473075</b>  | ± 0,140415 | <b>0,968846</b>  | ± 0,146715 | 2,119088        | ± 0,179597 |
| Asparagine           | 19     | 3,924800 | ± 0,297487 | <b>1,362557</b>  | ± 0,394699 | <b>0,781926</b>  | ± 0,182428 | <b>1,124437</b> | ± 0,290354 |
| Asparagine           | 24     | 1        | ± 0,023495 | <b>1,210446</b>  | ± 0,052176 | 0,780985         | ± n.d.     | 1,020384        | ± 0,028513 |
| Aspartate            | 0      | 1        | ± 0,351339 | 1,000500         | ± 0,083593 | 1,067679         | ± 0,366687 | 0,817271        | ± 0,309010 |
| Aspartate            | 3      | 6,514785 | ± 0,970981 | <b>2,852466</b>  | ± 0,423121 | <b>3,190904</b>  | ± 0,479090 | <b>3,127673</b> | ± 0,911763 |
| Aspartate            | 7      | 4,788593 | ± 1,803515 | 2,529015         | ± 0,557946 | <b>0,800522</b>  | ± 0,280744 | 2,268161        | ± 0,430491 |
| Aspartate            | 11     | 3,686745 | ± 0,967326 | 2,811618         | ± 0,570005 | <b>1,685108</b>  | ± 0,704471 | <b>1,438597</b> | ± 1,002510 |
| Aspartate            | 15     | 4,215970 | ± 0,981499 | <b>1,114384</b>  | ± 0,322982 | <b>1,106025</b>  | ± 0,439829 | <b>2,558036</b> | ± 0,873268 |
| Aspartate            | 17     | 3,191204 | ± 0,250759 | <b>1,341443</b>  | ± 0,312853 | <b>2,138274</b>  | ± 0,145543 | 2,603414        | ± 0,170685 |
| Aspartate            | 19     | 4,623991 | ± 0,219572 | <b>1,454980</b>  | ± 0,291095 | <b>1,740418</b>  | ± 0,288485 | <b>1,516537</b> | ± 0,206794 |
| Aspartate            | 24     | 1        | ± 0,351339 | 1,000500         | ± 0,083593 | 1,067679         | ± 0,366687 | 0,817271        | ± 0,309010 |
| Benzoate             | 0      | 1        | ± 0,281809 | 0,767196         | ± 0,167745 | 0,592803         | ± 0,047406 | 0,536641        | ± 0,023742 |
| Benzoate             | 3      | 1,591737 | ± 0,267711 | 1,674312         | ± 0,728768 | 1,709526         | ± 0,350239 | 1,536405        | ± 0,260360 |
| Benzoate             | 7      | 1,318062 | ± 0,185682 | 1,475172         | ± 0,365600 | <b>1,772678</b>  | ± 0,225718 | <b>1,897969</b> | ± 0,223403 |
| Benzoate             | 11     | 3,138839 | ± 0,581251 | <b>1,199533</b>  | ± 0,129469 | <b>1,758351</b>  | ± 0,233171 | <b>1,230088</b> | ± 0,144404 |
| Benzoate             | 15     | 2,616838 | ± 0,273973 | <b>1,395759</b>  | ± 0,194268 | <b>1,903120</b>  | ± 0,206500 | <b>1,626341</b> | ± 0,252241 |
| Benzoate             | 17     | 2,688295 | ± 0,084134 | 2,059369         | ± 0,305732 | 2,239422         | ± 0,180377 | 3,983922        | ± 0,555930 |
| Benzoate             | 19     | 5,568404 | ± 0,755633 | 2,802970         | ± 0,933830 | 3,820028         | ± 0,492990 | 3,650559        | ± 0,546189 |
| Benzoate             | 24     | 1        | ± 0,281809 | 0,767196         | ± 0,167745 | 0,592803         | ± 0,047406 | 0,536641        | ± 0,023742 |
| beta-Alanine         | 0      | 1        | ± 0,145484 | 0,714923         | ± 0,173896 | 0,822746         | ± 0,157261 | 0,730817        | ± 0,131349 |
| beta-Alanine         | 3      | 1,503259 | ± 0,079698 | <b>1,110455</b>  | ± 0,146052 | 1,321142         | ± 0,195856 | 1,252294        | ± 0,282277 |
| beta-Alanine         | 7      | 3,507099 | ± 0,294583 | <b>2,204077</b>  | ± 0,189889 | <b>1,642748</b>  | ± 0,119937 | <b>2,061972</b> | ± 0,192653 |
| beta-Alanine         | 11     | 3,640928 | ± 0,645409 | 3,605922         | ± 0,177516 | <b>2,521483</b>  | ± 0,204305 | <b>2,494419</b> | ± 0,364356 |
| beta-Alanine         | 15     | 2,369682 | ± 0,292654 | <b>1,465936</b>  | ± 0,105936 | <b>1,482638</b>  | ± 0,126362 | 2,002739        | ± 0,157803 |
| beta-Alanine         | 17     | 2,523370 | ± 0,053271 | <b>1,375874</b>  | ± 0,162022 | <b>1,663986</b>  | ± 0,078945 | <b>1,567496</b> | ± 0,083434 |
| beta-Alanine         | 19     | 2,447280 | ± 0,095313 | 2,282473         | ± 0,061744 | <b>1,602239</b>  | ± 0,129572 | <b>1,401056</b> | ± 0,019917 |
| beta-Alanine         | 24     | 1        | ± 0,145484 | 0,714923         | ± 0,173896 | 0,822746         | ± 0,157261 | 0,730817        | ± 0,131349 |
| beta-Hydroxybutyrate | 0      | 1        | ± 0,163878 | <b>2,954425</b>  | ± 0,120347 | <b>3,872921</b>  | ± 0,912787 | <b>3,140567</b> | ± 0,557882 |
| beta-Hydroxybutyrate | 3      | 0,805012 | ± 0,123847 | <b>1,323967</b>  | ± 0,236074 | <b>2,256695</b>  | ± 0,521433 | <b>1,724784</b> | ± 0,314957 |
| beta-Hydroxybutyrate | 7      | 1,971145 | ± 0,575632 | n.d.             | ± n.d.     | <b>0,756098</b>  | ± 0,014461 | <b>3,488215</b> | ± 0,479278 |
| beta-Hydroxybutyrate | 11     | 2,574126 | ± 0,785133 | 1,865530         | ± 0,105362 | 0,851894         | ± n.d.     | <b>1,166364</b> | ± 0,067272 |
| beta-Hydroxybutyrate | 15     | 1,850752 | ± 0,472182 | n.d.             | ± n.d.     | n.d.             | ± n.d.     | n.d.            | ± n.d.     |
| beta-Hydroxybutyrate | 17     | 0,720368 | ± 0,138098 | 0,659107         | ± 0,183602 | 0,390387         | ± 0,085897 | 0,921057        | ± 0,288992 |
| beta-Hydroxybutyrate | 19     | 1,714616 | ± 0,751559 | 0,795030         | ± 0,271198 | 0,945023         | ± 0,346906 | 0,866422        | ± 0,216054 |

|                      |    |          |            |                 |            |                 |            |                 |            |
|----------------------|----|----------|------------|-----------------|------------|-----------------|------------|-----------------|------------|
| beta-Hydroxybutyrate | 24 | 1        | ± 0,163878 | <b>2,954425</b> | ± 0,120347 | <b>3,872921</b> | ± 0,912787 | <b>3,140567</b> | ± 0,557882 |
| Citrate/Isocitrate   | 0  | 1        | ± 0,186318 | 0,804088        | ± 0,182031 | 0,603043        | ± 0,101026 | 0,707743        | ± 0,132552 |
| Citrate/Isocitrate   | 3  | 0,446747 | ± 0,117253 | 0,368083        | ± 0,032823 | 0,435929        | ± 0,037671 | 0,556301        | ± 0,057447 |
| Citrate/Isocitrate   | 7  | 0,203928 | ± 0,034548 | 0,282745        | ± 0,037079 | 0,250986        | ± 0,036454 | <b>0,511382</b> | ± 0,121960 |
| Citrate/Isocitrate   | 11 | 0,283428 | ± 0,067309 | 0,385328        | ± 0,031374 | <b>0,462246</b> | ± 0,031936 | <b>0,590728</b> | ± 0,085631 |
| Citrate/Isocitrate   | 15 | 0,363069 | ± 0,060612 | 0,392211        | ± 0,060178 | 0,404682        | ± 0,043411 | <b>0,646176</b> | ± 0,086331 |
| Citrate/Isocitrate   | 17 | 0,798526 | ± 0,014397 | 0,982704        | ± 0,099183 | 1,002996        | ± 0,085841 | 0,700933        | ± 0,048065 |
| Citrate/Isocitrate   | 19 | 0,781442 | ± 0,081890 | <b>0,459510</b> | ± 0,090748 | <b>1,138391</b> | ± 0,091886 | <b>1,384534</b> | ± 0,143456 |
| Citrate/Isocitrate   | 24 | 1        | ± 0,186318 | 0,804088        | ± 0,182031 | 0,603043        | ± 0,101026 | 0,707743        | ± 0,132552 |
| Cysteine             | 0  | 1        | ± 0,063724 | <b>0,855420</b> | ± 0,037985 | <b>0,853017</b> | ± 0,025045 | <b>0,785178</b> | ± 0,083057 |
| Cysteine             | 3  | 1,220309 | ± 0,092933 | 1,127008        | ± 0,050518 | 1,331777        | ± 0,088309 | 1,113632        | ± 0,084912 |
| Cysteine             | 7  | 1,220242 | ± 0,138957 | 1,371206        | ± 0,002954 | 1,231831        | ± 0,019655 | 1,162984        | ± 0,018941 |
| Cysteine             | 11 | 1,823779 | ± n.d.     | 1,264366        | ± 0,059550 | 1,309854        | ± 0,078773 | 1,452789        | ± 0,044602 |
| Cysteine             | 15 | 1,500081 | ± 0,198453 | <b>1,145131</b> | ± 0,061654 | 1,291624        | ± 0,085780 | 1,457527        | ± 0,114739 |
| Cysteine             | 17 | 0,718628 | ± 0,105690 | 0,864981        | ± 0,112328 | 1,029791        | ± 0,262983 | <b>1,193133</b> | ± 0,135295 |
| Cysteine             | 19 | 1,382160 | ± 0,162609 | 1,610764        | ± 0,575911 | 1,404087        | ± 0,410136 | 0,954386        | ± 0,217127 |
| Cysteine             | 24 | 1        | ± 0,063724 | <b>0,855420</b> | ± 0,037985 | <b>0,853017</b> | ± 0,025045 | <b>0,785178</b> | ± 0,083057 |
| Fructose             | 0  | 1        | ± 0,219027 | 0,661523        | ± 0,204834 | 0,747239        | ± 0,146342 | 1,095053        | ± 0,282726 |
| Fructose             | 3  | 5,258515 | ± 3,133797 | 2,310020        | ± 0,169674 | 2,347655        | ± 0,217621 | 2,109377        | ± 0,189254 |
| Fructose             | 7  | 1,461978 | ± 0,099600 | <b>1,931076</b> | ± 0,048468 | <b>1,164947</b> | ± 0,068065 | 1,743169        | ± 0,184990 |
| Fructose             | 11 | 0,883522 | ± 0,112602 | <b>1,314816</b> | ± 0,158847 | <b>1,557395</b> | ± 0,095157 | 0,965579        | ± 0,088063 |
| Fructose             | 15 | 1,367303 | ± 0,108738 | <b>1,771176</b> | ± 0,105842 | <b>2,210263</b> | ± 0,193068 | <b>2,051870</b> | ± 0,101028 |
| Fructose             | 17 | 1,165383 | ± 0,046352 | 1,380116        | ± 0,097738 | <b>1,772601</b> | ± 0,097864 | 1,188314        | ± 0,054107 |
| Fructose             | 19 | 5,212601 | ± 0,285707 | <b>1,971293</b> | ± 0,114924 | <b>2,500559</b> | ± 0,149878 | <b>3,024702</b> | ± 0,121434 |
| Fructose             | 24 | 1        | ± 0,219027 | 0,661523        | ± 0,204834 | 0,747239        | ± 0,146342 | 1,095053        | ± 0,282726 |
| Fructose-6P          | 0  | 1        | ± 0,194709 | 1,414607        | ± 0,176824 | <b>1,569073</b> | ± 0,181432 | 1,380519        | ± 0,225798 |
| Fructose-6P          | 3  | 1,309772 | ± 0,239446 | 1,661564        | ± 0,377276 | 1,979119        | ± 0,625425 | <b>2,499108</b> | ± 0,293772 |
| Fructose-6P          | 7  | 1,500892 | ± 0,481284 | 2,157835        | ± 0,338204 | 1,073278        | ± 0,151599 | 1,399513        | ± 0,111784 |
| Fructose-6P          | 11 | n.d.     | ± n.d.     | 1,607997        | ± 0,317688 | 1,511074        | ± 0,157475 | 2,317418        | ± 0,258971 |
| Fructose-6P          | 15 | 1,424005 | ± 0,140095 | 1,686549        | ± 0,470815 | 1,648972        | ± 0,133096 | <b>3,245789</b> | ± 0,443879 |
| Fructose-6P          | 17 | 2,896049 | ± 0,084827 | 2,959915        | ± 0,198288 | 2,753646        | ± 0,240830 | 1,906223        | ± 0,473907 |
| Fructose-6P          | 19 | 1,800384 | ± 0,381829 | 2,524055        | ± 0,838455 | 2,741532        | ± 0,189755 | 2,672499        | ± 0,430258 |
| Fructose-6P          | 24 | 1        | ± 0,194709 | 1,414607        | ± 0,176824 | <b>1,569073</b> | ± 0,181432 | 1,380519        | ± 0,225798 |
| Fumarate             | 0  | 1        | ± 0,107940 | <b>0,417707</b> | ± 0,029406 | <b>0,418501</b> | ± 0,065295 | <b>0,317920</b> | ± 0,032562 |
| Fumarate             | 3  | 0,984154 | ± 0,111417 | <b>0,440188</b> | ± 0,038870 | <b>0,415692</b> | ± 0,031814 | <b>0,319808</b> | ± 0,019051 |
| Fumarate             | 7  | 1,075781 | ± 0,157545 | <b>0,365407</b> | ± 0,032500 | <b>0,478924</b> | ± 0,052369 | <b>0,507805</b> | ± 0,059755 |
| Fumarate             | 11 | 1,501156 | ± 0,102578 | <b>0,485829</b> | ± 0,057643 | <b>0,548023</b> | ± 0,061094 | <b>0,493367</b> | ± 0,044562 |
| Fumarate             | 15 | 1,549364 | ± 0,080725 | <b>0,669020</b> | ± 0,045648 | <b>0,740405</b> | ± 0,044427 | <b>0,618552</b> | ± 0,014249 |
| Fumarate             | 17 | 1,029224 | ± 0,033162 | <b>0,602342</b> | ± 0,079086 | <b>0,468239</b> | ± 0,025309 | <b>0,720584</b> | ± 0,041245 |
| Fumarate             | 19 | 1,617949 | ± 0,073053 | <b>0,267816</b> | ± 0,007480 | <b>0,523345</b> | ± 0,010195 | <b>0,707991</b> | ± 0,017800 |
| Fumarate             | 24 | 1        | ± 0,107940 | <b>0,417707</b> | ± 0,029406 | <b>0,418501</b> | ± 0,065295 | <b>0,317920</b> | ± 0,032562 |
| GABA                 | 0  | 1        | ± 0,075366 | <b>0,499235</b> | ± 0,041158 | <b>0,374643</b> | ± 0,039121 | <b>0,412134</b> | ± 0,070244 |
| GABA                 | 3  | 1,607954 | ± 0,129865 | 1,349513        | ± 0,098851 | 1,329836        | ± 0,108789 | 1,110025        | ± 0,108684 |
| GABA                 | 7  | 1,030455 | ± 0,186054 | 1,195756        | ± 0,179746 | 0,976777        | ± 0,097327 | 0,799146        | ± 0,143839 |
| GABA                 | 11 | 0,808832 | ± 0,053248 | <b>1,659395</b> | ± 0,083249 | <b>1,710299</b> | ± 0,137751 | <b>1,635307</b> | ± 0,139006 |
| GABA                 | 15 | 0,938173 | ± 0,131632 | 1,273461        | ± 0,139123 | <b>1,445452</b> | ± 0,164056 | <b>1,452881</b> | ± 0,183364 |
| GABA                 | 17 | 0,894202 | ± 0,033677 | 0,676048        | ± 0,097881 | 1,049390        | ± 0,305902 | <b>1,628478</b> | ± 0,042815 |
| GABA                 | 19 | 1,137802 | ± 0,087295 | 0,963242        | ± 0,060109 | 0,957075        | ± 0,093410 | <b>0,858855</b> | ± 0,047892 |
| GABA                 | 24 | 1        | ± 0,075366 | <b>0,499235</b> | ± 0,041158 | <b>0,374643</b> | ± 0,039121 | <b>0,412134</b> | ± 0,070244 |
| Galactose            | 0  | 1        | ± 0,102702 | 0,912833        | ± 0,098477 | 0,891044        | ± 0,122298 | 1,063835        | ± 0,151255 |
| Galactose            | 3  | 1,516487 | ± 0,213643 | 1,332089        | ± 0,039768 | 1,478506        | ± 0,097729 | 1,303525        | ± 0,029531 |
| Galactose            | 7  | 1,764021 | ± 0,179140 | 1,590185        | ± 0,112561 | <b>1,481151</b> | ± 0,030130 | 1,531508        | ± 0,094495 |
| Galactose            | 11 | 1,187463 | ± 0,188357 | <b>1,785036</b> | ± 0,094038 | <b>1,618063</b> | ± 0,064751 | <b>1,677555</b> | ± 0,106495 |
| Galactose            | 15 | 1,663020 | ± 0,101002 | 1,525071        | ± 0,090103 | <b>1,403248</b> | ± 0,074037 | 1,631180        | ± 0,048693 |
| Galactose            | 17 | 2,187794 | ± 0,148160 | 3,185286        | ± 1,020201 | 2,050011        | ± 0,057448 | 1,861025        | ± 0,304684 |
| Galactose            | 19 | 4,307151 | ± 0,232976 | <b>2,384932</b> | ± 0,119651 | <b>2,671861</b> | ± 0,098224 | <b>2,459197</b> | ± 0,081570 |
| Galactose            | 24 | 1        | ± 0,102702 | 0,912833        | ± 0,098477 | 0,891044        | ± 0,122298 | 1,063835        | ± 0,151255 |
| Gluconate            | 0  | 1        | ± 0,095415 | 1,095215        | ± 0,056207 | 0,919271        | ± 0,132079 | 1,041945        | ± 0,107954 |
| Gluconate            | 3  | 1,328632 | ± 0,175847 | 1,537469        | ± 0,089184 | 1,517645        | ± 0,281235 | 1,625120        | ± 0,199242 |
| Gluconate            | 7  | 1,591559 | ± 0,270889 | 1,546312        | ± 0,233508 | 1,482465        | ± 0,079700 | 1,495564        | ± 0,011007 |
| Gluconate            | 11 | 0,964513 | ± 0,165758 | <b>1,781276</b> | ± 0,135098 | <b>1,644530</b> | ± 0,118852 | <b>1,868521</b> | ± 0,112370 |
| Gluconate            | 15 | 1,286638 | ± 0,045713 | 1,337778        | ± 0,173888 | <b>1,143288</b> | ± 0,084089 | <b>1,632927</b> | ± 0,077545 |
| Gluconate            | 17 | 1,727876 | ± 0,214484 | <b>0,957825</b> | ± 0,190417 | 1,244231        | ± 0,344278 | 1,028966        | ± 0,198090 |
| Gluconate            | 19 | 2,050800 | ± 0,149367 | 1,630888        | ± 0,187060 | 1,645959        | ± 0,200409 | 1,844411        | ± 0,130960 |
| Gluconate            | 24 | 1        | ± 0,095415 | 1,095215        | ± 0,056207 | 0,919271        | ± 0,132079 | 1,041945        | ± 0,107954 |
| Glucosamine          | 0  | 1        | ± 0,169881 | <b>0,600304</b> | ± 0,152984 | <b>0,545921</b> | ± 0,110469 | 0,954691        | ± 0,232459 |
| Glucosamine          | 3  | 2,165884 | ± 0,255565 | 1,708146        | ± 0,450840 | 2,261971        | ± 0,548039 | 2,032338        | ± 0,734183 |
| Glucosamine          | 7  | 1,231452 | ± 0,206311 | <b>1,905199</b> | ± 0,278732 | <b>0,796626</b> | ± 0,067896 | 1,250153        | ± 0,218110 |
| Glucosamine          | 11 | 0,820560 | ± 0,154971 | 0,945254        | ± 0,174851 | <b>1,293404</b> | ± 0,235593 | 0,811446        | ± 0,109195 |
| Glucosamine          | 15 | 0,980046 | ± 0,140405 | 1,128626        | ± 0,076235 | <b>1,758898</b> | ± 0,353769 | <b>1,457529</b> | ± 0,265491 |
| Glucosamine          | 17 | 0,592564 | ± 0,192188 | 0,856795        | ± 0,054008 | 1,355004        | ± 0,421523 | <b>1,548805</b> | ± 0,087503 |
| Glucosamine          | 19 | 7,580879 | ± 1,831570 | <b>1,555962</b> | ± 0,367260 | <b>2,458979</b> | ± 0,708472 | <b>1,538785</b> | ± 0,209921 |
| Glucosamine          | 24 | 1        | ± 0,169881 | <b>0,600304</b> | ± 0,152984 | <b>0,545921</b> | ± 0,110469 | 0,954691        | ± 0,232459 |
| Glucose              | 0  | 1        | ± 0,119048 | <b>0,553413</b> | ± 0,162600 | <b>0,667405</b> | ± 0,113064 | 0,964040        | ± 0,190080 |
| Glucose              | 3  | 1,288234 | ± 0,220379 | 0,979949        | ± 0,062056 | 1,010551        | ± 0,043144 | <b>0,805970</b> | ± 0,118129 |
| Glucose              | 7  | 0,744955 | ± 0,092384 | <b>1,180923</b> | ± 0,106367 | 0,603801        | ± 0,039862 | 0,945819        | ± 0,106632 |
| Glucose              | 11 | 0,453023 | ± 0,053940 | <b>0,690232</b> | ± 0,123665 | <b>0,949649</b> | ± 0,090190 | 0,545702        | ± 0,121568 |
| Glucose              | 15 | 0,579608 | ± 0,060250 | <b>0,870827</b> | ± 0,055609 | <b>1,228713</b> | ± 0,130322 | <b>1,106090</b> | ± 0,040252 |
| Glucose              | 17 | 0,866014 | ± 0,021065 | <b>1,027878</b> | ± 0,046550 | <b>1,214663</b> | ± 0,061931 | <b>0,744537</b> | ± 0,041969 |
| Glucose              | 19 | 5,390672 | ± 0,176428 | <b>1,148668</b> | ± 0,096991 | <b>1,303742</b> | ± 0,051204 | <b>1,674067</b> | ± 0,087558 |
| Glucose              | 24 | 1        | ± 0,119048 | <b>0,553413</b> | ± 0,162600 | <b>0,667405</b> | ± 0,113064 | 0,964040        | ± 0,190080 |
| Glucose-6P           | 0  | 1        | ± 0,281654 | 1,241121        | ± 0,236953 | 1,142545        | ± 0,174185 | 1,045402        | ± 0,128549 |
| Glucose-6P           | 3  | 0,688127 | ± 0,173968 | <b>1,460495</b> | ± 0,278114 | 1,242175        | ± 0,463336 | <b>1,448716</b> | ± 0,356151 |
| Glucose-6P           | 7  | 1,095494 | ± 0,372979 | 1,340749        | ± 0,458373 | 0,813458        | ± 0,074540 | 1,129642        | ± 0,029063 |
| Glucose-6P           | 11 | 0,277237 | ± 0,027532 | <b>1,158872</b> | ± 0,177094 | <b>1,078317</b> | ± 0,230186 | <b>1,653769</b> | ± 0,234522 |
| Glucose-6P           | 15 | 1,126461 | ± 0,081310 | <b>1,594872</b> | ± 0,353121 | <b>1,422750</b> | ± 0,066767 | <b>2,751218</b> | ± 0,249414 |
| Glucose-6P           | 17 | 2,455217 | ± 0,057334 | <b>2,840605</b> | ± 0,145475 | 2,662661        | ± 0,212244 | <b>1,863472</b> | ± 0,154997 |
| Glucose-6P           | 19 | 1,684225 | ± 0,141350 | 2,328082        | ± 0,664185 | <b>2,537655</b> | ± 0,156569 | <b>2,591720</b> | ± 0,083631 |
| Glucose-6P           | 24 | 1        | ± 0,281654 | 1,241121        | ± 0,236953 | 1,142545        | ± 0,174185 | 1,045402        | ± 0,128549 |
| Glutamate            | 0  | 1        | ± 0,225513 | 0,600606        | ± 0,107602 | <b>0,384412</b> | ± 0,114451 | <b>0,345048</b> | ± 0,072533 |
| Glutamate            | 3  | 4,730090 | ± 0,349180 | <b>2,893704</b> | ± 0,540326 | <b>3,023117</b> | ± 0,550339 | <b>2,304292</b> | ± 0,735085 |
| Gl                   |    |          |            |                 |            |                 |            |                 |            |

|              |    |                        |                              |                              |                               |
|--------------|----|------------------------|------------------------------|------------------------------|-------------------------------|
| Glutamate    | 17 | 14,987158 ± 0,998558   | <b>4,501521</b> ± 1,341938   | <b>8,937059</b> ± 0,734206   | 12,795646 ± 0,909354          |
| Glutamate    | 19 | 24,322831 ± 1,080387   | <b>8,374593</b> ± 2,024249   | <b>8,325666</b> ± 1,852126   | <b>8,674514</b> ± 1,414845    |
| Glutamate    | 24 | 1 ± 0,225513           | 0,606006 ± 0,107602          | <b>0,384412</b> ± 0,114451   | <b>0,345048</b> ± 0,072533    |
| Glutamine    | 0  | 1 ± 0,075174           | 1,055563 ± 0,061758          | 1,083800 ± 0,079849          | 0,975074 ± 0,086457           |
| Glutamine    | 3  | 0,840973 ± 0,100027    | 1,385792 ± 0,312102          | <b>1,869581</b> ± 0,390933   | 1,687157 ± 0,437769           |
| Glutamine    | 7  | 0,883646 ± 0,247487    | 1,370122 ± 0,324276          | 1,246494 ± 0,131820          | 1,245390 ± 0,143577           |
| Glutamine    | 11 | 1,591359 ± 0,299492    | 1,249797 ± 0,050924          | 1,309282 ± 0,120589          | 1,214062 ± 0,077990           |
| Glutamine    | 15 | 1,392390 ± 0,152333    | 1,202851 ± 0,057469          | 1,474701 ± 0,135041          | 1,255442 ± 0,104179           |
| Glutamine    | 17 | 1,366214 ± 0,174645    | <b>0,336741</b> ± 0,063943   | <b>0,634982</b> ± 0,171494   | 1,224556 ± 0,101912           |
| Glutamine    | 19 | 2,321915 ± 0,187141    | <b>0,933872</b> ± 0,323114   | <b>0,587601</b> ± 0,177719   | <b>0,895141</b> ± 0,183502    |
| Glutamine    | 24 | 1 ± 0,075174           | 1,055563 ± 0,061758          | 1,083800 ± 0,079849          | 0,975074 ± 0,086457           |
| Glycerate    | 0  | 1 ± 0,064430           | <b>0,541853</b> ± 0,062345   | <b>0,700489</b> ± 0,077798   | 0,775071 ± 0,125426           |
| Glycerate    | 3  | 3,948774 ± 0,349948    | 4,308648 ± 0,303771          | <b>5,457631</b> ± 0,525751   | 4,677061 ± 0,369386           |
| Glycerate    | 7  | 4,319304 ± 0,365916    | 5,771861 ± 0,689972          | <b>6,281842</b> ± 0,223545   | <b>6,380108</b> ± 0,287077    |
| Glycerate    | 11 | 6,208731 ± 0,685845    | <b>8,639325</b> ± 0,733847   | <b>9,764488</b> ± 1,249054   | 8,259021 ± 0,796464           |
| Glycerate    | 15 | 5,751135 ± 0,397961    | 6,458195 ± 0,389599          | 6,238368 ± 0,644056          | 5,653379 ± 0,555184           |
| Glycerate    | 17 | 2,467973 ± 0,041157    | 2,198273 ± 0,180756          | 2,640348 ± 0,157904          | 2,374798 ± 0,084752           |
| Glycerate    | 19 | 2,104010 ± 0,085995    | 1,764929 ± 0,154678          | 2,273854 ± 0,092515          | <b>2,917646</b> ± 0,058117    |
| Glycerate    | 24 | 1 ± 0,064430           | <b>0,541853</b> ± 0,062345   | <b>0,700489</b> ± 0,077798   | 0,775071 ± 0,125426           |
| Glycerol     | 0  | 1 ± 0,114913           | <b>0,613261</b> ± 0,110079   | 0,796016 ± 0,111573          | 0,827718 ± 0,146014           |
| Glycerol     | 3  | 1,116600 ± 0,100543    | 1,007095 ± 0,269114          | 1,094120 ± 0,128121          | 1,019682 ± 0,276096           |
| Glycerol     | 7  | 0,725916 ± 0,080443    | <b>0,862649</b> ± 0,021591   | 0,669031 ± 0,029954          | <b>0,941228</b> ± 0,114511    |
| Glycerol     | 11 | 0,858389 ± 0,111882    | 1,048020 ± 0,170658          | <b>1,237763</b> ± 0,127489   | 1,041249 ± 0,062399           |
| Glycerol     | 15 | 1,023791 ± 0,102904    | 0,948766 ± 0,048725          | <b>1,419214</b> ± 0,126118   | <b>1,257254</b> ± 0,114048    |
| Glycerol     | 17 | 0,799254 ± 0,015809    | 0,739980 ± 0,086393          | 0,857188 ± 0,077149          | <b>0,945608</b> ± 0,054496    |
| Glycerol     | 19 | 1,130306 ± 0,086075    | 1,185717 ± 0,055348          | 1,034001 ± 0,025944          | 1,159454 ± 0,034824           |
| Glycerol     | 24 | 1 ± 0,114913           | <b>0,613261</b> ± 0,110079   | 0,796016 ± 0,111573          | 0,827718 ± 0,146014           |
| Glycine      | 0  | 1 ± 0,074548           | <b>1,509447</b> ± 0,177752   | 1,327213 ± 0,187782          | 1,212384 ± 0,195304           |
| Glycine      | 3  | 27,630648 ± 4,823797   | <b>12,565343</b> ± 1,324481  | <b>12,744432</b> ± 1,127492  | <b>15,573656</b> ± 2,094559   |
| Glycine      | 7  | 68,475332 ± 20,655516  | 29,763564 ± 5,837378         | 35,888806 ± 10,209547        | 27,276149 ± 4,954535          |
| Glycine      | 11 | 117,401313 ± 39,543794 | 81,226812 ± 23,141753        | 46,554754 ± 14,062875        | 35,008082 ± 8,368314          |
| Glycine      | 15 | 100,146995 ± 32,156494 | 59,440033 ± 14,450397        | 35,561798 ± 6,538848         | 54,971443 ± 13,305830         |
| Glycine      | 17 | 44,460779 ± 1,056212   | <b>111,276472</b> ± 6,046388 | <b>119,455240</b> ± 9,245613 | <b>379,679936</b> ± 22,332042 |
| Glycine      | 19 | 48,234072 ± 1,770304   | <b>69,333935</b> ± 4,999646  | <b>71,025981</b> ± 5,099812  | <b>278,530142</b> ± 4,789187  |
| Glycine      | 24 | 1 ± 0,074548           | <b>1,509447</b> ± 0,177752   | 1,327213 ± 0,187782          | 1,212384 ± 0,195304           |
| Glycolate    | 0  | 1 ± 0,067809           | 0,953874 ± 0,111068          | 1,000382 ± 0,173107          | 1,121774 ± 0,168832           |
| Glycolate    | 3  | 2,029595 ± 0,680747    | 2,214305 ± 0,518113          | 2,768988 ± 0,722530          | 2,669049 ± 0,598703           |
| Glycolate    | 7  | 1,451264 ± 0,097490    | 1,566351 ± 0,151117          | <b>1,702391</b> ± 0,126974   | <b>1,861315</b> ± 0,236908    |
| Glycolate    | 11 | 2,091710 ± 0,324304    | 2,491136 ± 0,370834          | 2,324068 ± 0,251511          | 2,318355 ± 0,239859           |
| Glycolate    | 15 | 4,405397 ± 3,664128    | 2,053570 ± 0,155199          | 2,076910 ± 0,214710          | 2,166821 ± 0,220250           |
| Glycolate    | 17 | 3,579500 ± 0,512304    | <b>1,783242</b> ± 0,520248   | 3,365573 ± 0,342404          | 2,968614 ± 0,635141           |
| Glycolate    | 19 | 3,903537 ± 0,912580    | 4,200077 ± 0,203945          | 2,846263 ± 0,233340          | 3,571423 ± 0,162827           |
| Glycolate    | 24 | 1 ± 0,067809           | 0,953874 ± 0,111068          | 1,000382 ± 0,173107          | 1,121774 ± 0,168832           |
| Glyoxylate   | 0  | 1 ± 0,167987           | 0,939622 ± 0,131260          | 1,467662 ± 0,329267          | 0,838337 ± 0,092203           |
| Glyoxylate   | 3  | 1,558159 ± 0,464016    | 2,281098 ± 0,255217          | 1,838931 ± 0,333567          | 2,266435 ± 0,379656           |
| Glyoxylate   | 7  | 2,368420 ± 0,627427    | 1,754406 ± 0,092575          | 1,708999 ± 0,244029          | 1,826864 ± 0,177995           |
| Glyoxylate   | 11 | 2,325586 ± 0,553598    | <b>3,521419</b> ± 0,238114   | 2,233075 ± 0,258154          | 2,418280 ± 0,449955           |
| Glyoxylate   | 15 | 3,085631 ± 0,312877    | <b>2,093212</b> ± 0,114769   | <b>1,982454</b> ± 0,204572   | <b>2,491477</b> ± 0,151888    |
| Glyoxylate   | 17 | 1,477946 ± 0,171773    | 1,194677 ± 0,271007          | 1,273064 ± 0,370683          | 2,551403 ± 0,502408           |
| Glyoxylate   | 19 | 4,038859 ± 1,033899    | 2,787134 ± 1,003515          | 1,599410 ± 0,573077          | 1,775510 ± 0,492812           |
| Glyoxylate   | 24 | 1 ± 0,167987           | 0,939622 ± 0,131260          | 1,467662 ± 0,329267          | 0,838337 ± 0,092203           |
| Histidine    | 0  | 1 ± 0,144047           | 0,987177 ± 0,091457          | 0,820541 ± 0,103934          | 0,997937 ± 0,165153           |
| Histidine    | 3  | 1,151043 ± 0,186170    | <b>0,760338</b> ± 0,056249   | 0,865514 ± 0,070133          | 0,777376 ± 0,163733           |
| Histidine    | 7  | 0,581090 ± 0,077540    | <b>0,879046</b> ± 0,087589   | 0,569670 ± n.d.              | 0,726875 ± 0,115146           |
| Histidine    | 11 | 0,457992 ± 0,102208    | 0,463066 ± 0,056500          | <b>0,707815</b> ± 0,075816   | 0,476557 ± 0,096789           |
| Histidine    | 15 | 0,414532 ± 0,040469    | <b>0,605014</b> ± 0,077658   | <b>0,897831</b> ± 0,177922   | <b>0,792955</b> ± 0,029988    |
| Histidine    | 17 | 0,264891 ± 0,028098    | <b>0,543289</b> ± 0,062341   | 0,395328 ± 0,107792          | 0,405017 ± 0,085334           |
| Histidine    | 19 | 1,637325 ± 0,219732    | <b>0,409828</b> ± 0,142498   | <b>0,399146</b> ± 0,070223   | <b>0,646773</b> ± 0,073817    |
| Histidine    | 24 | 1 ± 0,144047           | 0,987177 ± 0,091457          | 0,820541 ± 0,103934          | 0,997937 ± 0,165153           |
| Hypoxanthine | 0  | 1 ± 0,184541           | 0,892208 ± 0,038644          | 0,804019 ± 0,034677          | 0,979249 ± 0,157669           |
| Hypoxanthine | 3  | 0,951677 ± 0,082513    | 1,090903 ± 0,101509          | <b>1,421575</b> ± 0,121534   | 0,950711 ± 0,162869           |
| Hypoxanthine | 7  | 1,033792 ± 0,134250    | 1,231526 ± 0,014664          | <b>1,389789</b> ± 0,048163   | <b>1,373900</b> ± 0,093432    |
| Hypoxanthine | 11 | 0,953316 ± 0,277081    | 1,205316 ± 0,082442          | 1,294441 ± 0,111244          | <b>1,524664</b> ± 0,040170    |
| Hypoxanthine | 15 | 1,099801 ± 0,116506    | 1,227889 ± 0,042493          | 1,163726 ± 0,107828          | <b>1,313725</b> ± 0,052022    |
| Hypoxanthine | 17 | 0,963432 ± 0,272052    | 0,808382 ± 0,228187          | 1,045812 ± 0,400952          | 0,937363 ± 0,342523           |
| Hypoxanthine | 19 | 0,933694 ± 0,326451    | 0,576214 ± 0,146453          | 0,333963 ± 0,041386          | 1,023512 ± 0,356226           |
| Hypoxanthine | 24 | 1 ± 0,184541           | 0,892208 ± 0,038644          | 0,804019 ± 0,034677          | 0,979249 ± 0,157669           |
| Inositol     | 0  | 1 ± 0,031988           | <b>1,191340</b> ± 0,025870   | 0,968923 ± 0,070076          | 0,962658 ± 0,043233           |
| Inositol     | 3  | 1,068965 ± 0,020224    | 1,235927 ± 0,129596          | <b>1,372405</b> ± 0,147928   | 1,342633 ± 0,185042           |
| Inositol     | 7  | 1,343659 ± 0,060766    | 1,260764 ± 0,102458          | <b>1,186922</b> ± 0,052328   | <b>1,187522</b> ± 0,070197    |
| Inositol     | 11 | 1,095964 ± 0,169400    | <b>1,376038</b> ± 0,043175   | 1,341135 ± 0,122764          | <b>1,394046</b> ± 0,011424    |
| Inositol     | 15 | 1,259389 ± 0,093444    | <b>1,005590</b> ± 0,036292   | <b>0,985837</b> ± 0,072802   | <b>1,095268</b> ± 0,072358    |
| Inositol     | 17 | 1,243468 ± 0,035409    | 1,311017 ± 0,060827          | 1,182412 ± 0,072582          | 1,463137 ± 0,111663           |
| Inositol     | 19 | 1,472351 ± 0,056961    | 1,404751 ± 0,064344          | 1,397046 ± 0,060763          | 1,538417 ± 0,039447           |
| Inositol     | 24 | 1 ± 0,031988           | <b>1,191340</b> ± 0,025870   | 0,968923 ± 0,070076          | 0,962658 ± 0,043233           |
| Isoleucine   | 0  | 1 ± 0,240675           | 0,768295 ± 0,015757          | 0,780325 ± 0,022359          | 0,698631 ± 0,031941           |
| Isoleucine   | 3  | 5,542262 ± 1,764858    | <b>2,427803</b> ± 0,091440   | 3,816089 ± 0,550581          | 3,150590 ± 0,516028           |
| Isoleucine   | 7  | 5,660658 ± 0,640868    | <b>3,731526</b> ± 0,310462   | <b>3,698998</b> ± 0,212729   | <b>4,170127</b> ± 0,189540    |
| Isoleucine   | 11 | 5,257308 ± 0,616502    | 4,757220 ± 0,629458          | 4,188165 ± 0,411215          | 4,617622 ± 0,311962           |
| Isoleucine   | 15 | 8,590451 ± 0,664074    | <b>4,171762</b> ± 0,266208   | <b>4,041980</b> ± 0,215724   | <b>5,093208</b> ± 0,350177    |
| Isoleucine   | 17 | 3,779892 ± 0,177645    | <b>1,347928</b> ± 0,414457   | <b>1,847910</b> ± 0,167726   | 3,937168 ± 0,645921           |
| Isoleucine   | 19 | 7,878485 ± 0,341309    | <b>2,539723</b> ± 0,419873   | <b>1,831842</b> ± 0,382887   | <b>1,730755</b> ± 0,303856    |
| Isoleucine   | 24 | 1 ± 0,240675           | 0,768295 ± 0,015757          | 0,780325 ± 0,022359          | 0,698631 ± 0,031941           |
| Lactate      | 0  | 1 ± 0,148409           | 0,853021 ± 0,039042          | 0,605071 ± 0,195095          | <b>0,402744</b> ± 0,128346    |
| Lactate      | 3  | 0,662771 ± 0,019478    | <b>1,286236</b> ± 0,374861   | <b>1,098857</b> ± 0,238089   | <b>1,283471</b> ± 0,199001    |
| Lactate      | 7  | 0,675466 ± 0,125211    | 0,857456 ± 0,161606          | 0,424472 ± 0,149741          | 0,953462 ± 0,288640           |
| Lactate      | 11 | 1,383415 ± 0,235826    | 1,503586 ± 0,128985          | 1,504845 ± 0,160719          | 1,731934 ± 0,510963           |
| Lactate      | 15 | 1,368308 ± 0,552103    | <b>0,625879</b> ± 0,087812   | 1,364006 ± 0,522532          | <b>3,021377</b> ± 0,991111    |
| Lactate      | 17 | 1,606411 ± 0,127997    | <b>1,180769</b> ± 0,036707   | 1,679756 ± 0,184430          | 1,335414 ± 0,140985           |
| Lactate      | 19 | 1,163065 ± 0,127968    | 0,873957 ± 0,162887          | 0,751977 ± 0,144994          | 0,819014 ± 0,104126           |
| Lactate      | 24 | 1 ± 0,148409           | 0,853021 ± 0,039042          | 0,605071 ± 0,195095          | <b>0,402744</b> ± 0,128346    |
| Leucine      | 0  | 1 ± 0,058377           | <b>0,580097</b> ± 0,107106   | <b>0,652194</b> ± 0,070385   | 0,795967 ± 0,118703           |
| Leucine      | 3  | 1,613686 ± 0,669186    | 1,486118 ± 0,324678          | 2,138375 ± 0,192801          | 2,040754 ± 0,336154           |
| Leucine      | 7  | 1,934180 ± 0,434794    | <b>2,664905</b> ± 0,196923   | 2,232138 ± 0,249777          | 2,618075 ± 0,246790           |

|                   |    |                      |                             |                            |                            |
|-------------------|----|----------------------|-----------------------------|----------------------------|----------------------------|
| Leucine           | 11 | 1,336287 ± 0,173349  | <b>3,628987</b> ± 0,388694  | <b>2,755473</b> ± 0,319879 | <b>3,115962</b> ± 0,173861 |
| Leucine           | 15 | 1,681598 ± 0,248801  | 1,923216 ± 0,206118         | <b>2,191823</b> ± 0,066876 | <b>2,889076</b> ± 0,290784 |
| Leucine           | 17 | 0,833312 ± 0,052712  | 6,137143 ± 2,445857         | <b>0,481624</b> ± 0,009718 | 0,904602 ± 0,104958        |
| Leucine           | 19 | 0,996944 ± 0,216460  | 2,226167 ± 1,420563         | 0,605488 ± 0,126483        | 0,781119 ± 0,009254        |
| Leucine           | 24 | 1 ± 0,058377         | <b>0,580097</b> ± 0,107106  | <b>0,652194</b> ± 0,070385 | 0,795967 ± 0,118703        |
| Lysine            | 0  | 1 ± 0,049258         | n.d. ± n.d.                 | 0,937903 ± 0,134360        | 0,953153 ± 0,161248        |
| Lysine            | 3  | 1,799236 ± 0,226157  | <b>1,391793</b> ± 0,002953  | <b>2,804096</b> ± 0,384091 | <b>2,568348</b> ± 0,177525 |
| Lysine            | 7  | 2,043415 ± 0,368004  | 2,296609 ± 0,129617         | 1,622964 ± 0,110311        | 2,026425 ± 0,024770        |
| Lysine            | 11 | n.d. ± n.d.          | 3,210801 ± 0,032814         | 2,813216 ± 0,089890        | 2,466054 ± 0,250116        |
| Lysine            | 15 | 1,378631 ± n.d.      | 1,397303 ± 0,241181         | 1,512139 ± 0,085489        | 2,304632 ± 0,134610        |
| Lysine            | 17 | 0,769812 ± 0,110863  | 0,457823 ± 0,066867         | 0,642357 ± 0,072026        | 0,983234 ± 0,302610        |
| Lysine            | 19 | 0,636930 ± 0,108198  | 0,588853 ± 0,061268         | 0,631514 ± 0,117920        | 0,886325 ± 0,084636        |
| Lysine            | 24 | 1 ± 0,049258         | n.d. ± n.d.                 | 0,937903 ± 0,134360        | 0,953153 ± 0,161248        |
| Malate            | 0  | 1 ± 0,146124         | <b>0,283036</b> ± 0,029665  | <b>0,264470</b> ± 0,033444 | <b>0,231213</b> ± 0,026553 |
| Malate            | 3  | 0,915014 ± 0,079804  | <b>0,343273</b> ± 0,045587  | <b>0,347022</b> ± 0,056928 | <b>0,344533</b> ± 0,048928 |
| Malate            | 7  | 1,237833 ± 0,130898  | <b>0,446641</b> ± 0,027572  | <b>0,495939</b> ± 0,049339 | <b>0,601092</b> ± 0,085074 |
| Malate            | 11 | 2,156788 ± 0,161882  | <b>0,611214</b> ± 0,045766  | <b>0,602286</b> ± 0,032024 | <b>0,636559</b> ± 0,020813 |
| Malate            | 15 | 2,080747 ± 0,063452  | <b>0,570541</b> ± 0,040273  | <b>0,564320</b> ± 0,022633 | <b>0,585989</b> ± 0,018687 |
| Malate            | 17 | 1,514836 ± 0,044064  | <b>0,525702</b> ± 0,061893  | <b>0,400607</b> ± 0,016637 | <b>0,391396</b> ± 0,022289 |
| Malate            | 19 | 1,577948 ± 0,080758  | <b>0,170427</b> ± 0,008884  | <b>0,361236</b> ± 0,006009 | <b>0,430185</b> ± 0,006008 |
| Malate            | 24 | 1 ± 0,146124         | <b>0,283036</b> ± 0,029665  | <b>0,264470</b> ± 0,033444 | <b>0,231213</b> ± 0,026553 |
| Maleate           | 0  | 1 ± 0,150239         | <b>0,496208</b> ± 0,043112  | <b>0,354356</b> ± 0,042275 | <b>0,216879</b> ± 0,029408 |
| Maleate           | 3  | 1,287619 ± 0,080050  | <b>1,062427</b> ± 0,069674  | <b>0,873840</b> ± 0,067096 | <b>0,524245</b> ± 0,068584 |
| Maleate           | 7  | 0,912775 ± 0,130112  | <b>0,578896</b> ± 0,126199  | <b>0,374722</b> ± 0,042454 | <b>0,490456</b> ± 0,096587 |
| Maleate           | 11 | 2,038649 ± 0,273940  | <b>0,694683</b> ± 0,037405  | <b>0,715792</b> ± 0,069218 | <b>0,725261</b> ± 0,091552 |
| Maleate           | 15 | 1,377819 ± 0,102596  | <b>0,589419</b> ± 0,036120  | <b>0,601564</b> ± 0,019658 | <b>0,615742</b> ± 0,030816 |
| Maleate           | 17 | 1,430663 ± 0,087079  | <b>0,576139</b> ± 0,133634  | <b>0,483147</b> ± 0,009232 | <b>0,563016</b> ± 0,054489 |
| Maleate           | 19 | 1,503699 ± 0,155621  | <b>0,396537</b> ± 0,049030  | <b>0,380213</b> ± 0,024374 | <b>0,481893</b> ± 0,015576 |
| Maleate           | 24 | 1 ± 0,150239         | <b>0,496208</b> ± 0,043112  | <b>0,354356</b> ± 0,042275 | <b>0,216879</b> ± 0,029408 |
| Maltose/Trehalose | 0  | 1 ± 0,134389         | <b>1,433714</b> ± 0,073473  | <b>1,824335</b> ± 0,288917 | 1,410677 ± 0,276166        |
| Maltose/Trehalose | 3  | 1,571689 ± 0,272248  | 1,432361 ± 0,091865         | 1,761423 ± 0,237348        | 1,649239 ± 0,096236        |
| Maltose/Trehalose | 7  | 1,408901 ± 0,350129  | 1,479779 ± 0,169343         | 1,159026 ± 0,142610        | 1,394347 ± 0,099555        |
| Maltose/Trehalose | 11 | 0,375654 ± 0,079513  | <b>1,479953</b> ± 0,210877  | <b>1,594387</b> ± 0,163054 | <b>1,511862</b> ± 0,149780 |
| Maltose/Trehalose | 15 | 1,139644 ± 0,150325  | 1,419028 ± 0,189519         | 1,004847 ± 0,059471        | <b>2,139364</b> ± 0,046789 |
| Maltose/Trehalose | 17 | 4,626525 ± 0,061920  | <b>2,827914</b> ± 0,304262  | <b>2,648638</b> ± 0,556376 | <b>2,545528</b> ± 0,559962 |
| Maltose/Trehalose | 19 | 3,930832 ± 0,176352  | 4,553185 ± 0,309903         | 4,066102 ± 0,142327        | <b>6,661387</b> ± 0,209104 |
| Maltose/Trehalose | 24 | 1 ± 0,134389         | <b>1,433714</b> ± 0,073473  | <b>1,824335</b> ± 0,288917 | 1,410677 ± 0,276166        |
| Mannitol/Sorbitol | 0  | 1 ± 0,161719         | 1,169947 ± 0,118509         | 0,913820 ± 0,070124        | 0,928656 ± 0,057836        |
| Mannitol/Sorbitol | 3  | 1,489155 ± 0,685584  | 0,868693 ± 0,125925         | 1,646465 ± 0,241559        | 0,792804 ± 0,111828        |
| Mannitol/Sorbitol | 7  | 1,582470 ± 0,232619  | 1,791698 ± 0,339624         | <b>0,960452</b> ± 0,078821 | 1,351192 ± 0,056486        |
| Mannitol/Sorbitol | 11 | 0,954562 ± 0,117816  | <b>1,388957</b> ± 0,090664  | <b>1,501836</b> ± 0,148331 | <b>1,604592</b> ± 0,096720 |
| Mannitol/Sorbitol | 15 | 3,802552 ± 0,262238  | <b>1,029241</b> ± 0,112119  | <b>2,424674</b> ± 0,346140 | <b>1,382704</b> ± 0,192410 |
| Mannitol/Sorbitol | 17 | 4,077870 ± 0,611223  | 4,008010 ± 1,765646         | <b>1,571336</b> ± 0,123609 | 4,109301 ± 0,901941        |
| Mannitol/Sorbitol | 19 | 4,988135 ± 0,1204939 | 3,042833 ± 1,359397         | 2,844920 ± 0,797160        | <b>1,491640</b> ± 0,251494 |
| Mannitol/Sorbitol | 24 | 1 ± 0,161719         | 1,169947 ± 0,118509         | 0,913820 ± 0,070124        | 0,928656 ± 0,057836        |
| Mannose           | 0  | 1 ± 0,175380         | 1,022250 ± 0,207487         | 1,107567 ± 0,197249        | 1,076192 ± 0,219783        |
| Mannose           | 3  | 1,930166 ± 0,586615  | 1,257895 ± 0,037995         | 1,318874 ± 0,099394        | 1,239735 ± 0,065959        |
| Mannose           | 7  | 2,253356 ± 0,160316  | <b>1,892101</b> ± 0,062110  | <b>1,675520</b> ± 0,053272 | 2,018095 ± 0,089137        |
| Mannose           | 11 | 1,429766 ± 0,152314  | <b>2,384400</b> ± 0,158361  | <b>2,115225</b> ± 0,090591 | <b>2,019450</b> ± 0,181887 |
| Mannose           | 15 | 2,158302 ± 0,149300  | 2,211484 ± 0,147006         | <b>1,799321</b> ± 0,172103 | 2,283308 ± 0,029370        |
| Mannose           | 17 | 1,232999 ± 0,514210  | 1,181714 ± 0,417686         | 0,824228 ± 0,312304        | 1,777254 ± 0,282502        |
| Mannose           | 19 | 1,495992 ± 0,471545  | 0,883608 ± 0,155820         | 1,175910 ± 0,496457        | 1,319702 ± 0,184135        |
| Mannose           | 24 | 1 ± 0,175380         | 1,022250 ± 0,207487         | 1,107567 ± 0,197249        | 1,076192 ± 0,219783        |
| Methionine        | 0  | 1 ± 0,066168         | 1,013260 ± 0,099737         | 0,814932 ± 0,258288        | 1,017021 ± 0,250834        |
| Methionine        | 3  | 6,687605 ± 0,696822  | 7,653925 ± 0,865227         | 5,931673 ± 0,954360        | 5,074150 ± 1,282046        |
| Methionine        | 7  | 8,661634 ± 2,865267  | 13,273985 ± 1,691463        | <b>2,153334</b> ± 0,729145 | 4,628079 ± 0,709640        |
| Methionine        | 11 | 3,325724 ± 1,302767  | <b>16,187348</b> ± 3,977658 | 2,585603 ± 0,858602        | 2,683425 ± 1,435263        |
| Methionine        | 15 | 33,606787 ± 9,102484 | <b>5,165467</b> ± 1,436207  | <b>2,134198</b> ± 0,829996 | <b>5,312715</b> ± 1,755924 |
| Methionine        | 17 | 17,622169 ± 2,449950 | <b>8,722590</b> ± 2,001116  | 15,667365 ± 0,806260       | 19,545294 ± 1,243308       |
| Methionine        | 19 | 12,396593 ± 2,073385 | 6,191826 ± 1,483690         | 8,977946 ± 2,901603        | 6,476809 ± 1,623024        |
| Methionine        | 24 | 1 ± 0,066168         | 1,013260 ± 0,099737         | 0,814932 ± 0,258288        | 1,017021 ± 0,250834        |
| Nicotinic acid    | 0  | 1 ± 0,182105         | <b>0,355806</b> ± 0,024391  | 0,140468 ± n.d.            | n.d. ± n.d.                |
| Nicotinic acid    | 3  | 1,332159 ± 0,264092  | <b>0,462133</b> ± 0,052521  | n.d. ± n.d.                | 0,326149 ± n.d.            |
| Nicotinic acid    | 7  | 1,126936 ± 0,250835  | <b>0,400267</b> ± 0,065048  | <b>0,258533</b> ± 0,034320 | 0,179283 ± n.d.            |
| Nicotinic acid    | 11 | 1,618864 ± 0,422995  | <b>0,629483</b> ± 0,115614  | <b>0,329369</b> ± 0,056109 | <b>0,310094</b> ± 0,040915 |
| Nicotinic acid    | 15 | 1,753442 ± 0,610768  | <b>0,428524</b> ± 0,071195  | n.d. ± n.d.                | n.d. ± n.d.                |
| Nicotinic acid    | 17 | 1,287723 ± 0,017284  | <b>0,617020</b> ± 0,094200  | n.d. ± n.d.                | <b>0,261466</b> ± 0,066713 |
| Nicotinic acid    | 19 | 1,188094 ± 0,093254  | <b>0,393399</b> ± 0,087484  | <b>0,439987</b> ± 0,091912 | <b>0,241924</b> ± 0,048392 |
| Nicotinic acid    | 24 | 1 ± 0,182105         | <b>0,355806</b> ± 0,024391  | 0,140468 ± n.d.            | n.d. ± n.d.                |
| Ornithine         | 0  | 1 ± 0,132288         | <b>2,085517</b> ± 0,053864  | <b>1,546262</b> ± 0,187221 | <b>1,681321</b> ± 0,116201 |
| Ornithine         | 3  | 4,796391 ± 3,576648  | 0,718772 ± 0,109321         | 1,738806 ± 0,451044        | 1,908562 ± 0,680506        |
| Ornithine         | 7  | 2,418099 ± 0,771918  | 1,318997 ± 0,321040         | 1,654637 ± 0,321431        | 1,350905 ± 0,075537        |
| Ornithine         | 11 | 1,231786 ± 0,136275  | 1,751118 ± 0,375220         | 1,748528 ± 0,514813        | 1,522657 ± 0,520410        |
| Ornithine         | 15 | 1,278113 ± 0,370961  | 1,538794 ± 0,395689         | 1,085594 ± 0,140152        | <b>2,324029</b> ± 0,482459 |
| Ornithine         | 17 | 1,209929 ± 0,218366  | 0,707435 ± 0,167478         | 0,846967 ± 0,277483        | 0,981739 ± 0,372392        |
| Ornithine         | 19 | 1,342119 ± 0,264113  | 1,471145 ± 0,353939         | 1,430755 ± 0,204219        | 0,959538 ± 0,193493        |
| Ornithine         | 24 | 1 ± 0,132288         | <b>2,085517</b> ± 0,053864  | <b>1,546262</b> ± 0,187221 | <b>1,681321</b> ± 0,116201 |
| Oxalate           | 0  | 1 ± 0,121022         | 1,028720 ± 0,137173         | 0,780505 ± 0,055699        | 1,078875 ± 0,278523        |
| Oxalate           | 3  | 1,855433 ± 0,322125  | 2,277378 ± 0,200276         | 2,016988 ± 0,352337        | <b>1,335522</b> ± 0,090361 |
| Oxalate           | 7  | 1,779664 ± 0,258882  | 1,404429 ± n.d.             | <b>0,829856</b> ± 0,095388 | <b>1,324253</b> ± 0,124288 |
| Oxalate           | 11 | 1,753397 ± 0,171448  | 1,994271 ± 0,327609         | 2,436202 ± 0,602761        | <b>1,077955</b> ± 0,157977 |
| Oxalate           | 15 | n.d. ± n.d.          | 0,712880 ± 0,070766         | n.d. ± n.d.                | 0,799597 ± 0,062131        |
| Oxalate           | 17 | n.d. ± n.d.          | n.d. ± n.d.                 | n.d. ± n.d.                | n.d. ± n.d.                |
| Oxalate           | 19 | n.d. ± n.d.          | n.d. ± n.d.                 | n.d. ± n.d.                | n.d. ± n.d.                |
| Oxalate           | 24 | 1 ± 0,121022         | 1,028720 ± 0,137173         | 0,780505 ± 0,055699        | 1,078875 ± 0,278523        |
| Oxaloacetate      | 0  | 1 ± 0,095263         | 1,151719 ± 0,212580         | 1,345393 ± 0,191166        | 1,277201 ± 0,177546        |
| Oxaloacetate      | 3  | 0,658676 ± 0,124911  | 0,725463 ± 0,086644         | 0,911908 ± 0,196586        | 0,687191 ± 0,056356        |
| Oxaloacetate      | 7  | 0,664284 ± 0,094643  | <b>1,068340</b> ± 0,121760  | 0,888599 ± 0,105174        | 0,792750 ± 0,041103        |
| Oxaloacetate      | 11 | 0,708494 ± 0,169456  | <b>1,440673</b> ± 0,126784  | <b>1,356090</b> ± 0,066550 | <b>1,381993</b> ± 0,091857 |
| Oxaloacetate      | 15 | 1,286194 ± 0,140036  | 1,081270 ± 0,049262         | <b>0,716880</b> ± 0,018567 | 1,268865 ± 0,032466        |
| Oxaloacetate      | 17 | 2,202484 ± 0,274310  | 1,825203 ± 0,249964         | 2,321441 ± 0,185426        | <b>0,750272</b> ± 0,313293 |
| Oxaloacetate      | 19 | 1,448516 ± 0,216991  | 1,062743 ± 0,305034         | 2,107259 ± 0,452723        | 2,243846 ± 0,347314        |
| Oxaloacetate      | 24 | 1 ± 0,095263         | 1,151719 ± 0,212580         | 1,345393 ± 0,191166        | 1,277201 ± 0,177546        |
| Phenylalanine     | 0  | 1 ± 0,078875         | <b>1,278820</b> ± 0,062680  | 1,260071 ± 0,223561        | <b>1,445675</b> ± 0,045834 |

|                |    |                      |                             |                            |                             |
|----------------|----|----------------------|-----------------------------|----------------------------|-----------------------------|
| Phenylalanine  | 3  | 2,883668 ± 0,325316  | <b>4,071334</b> ± 0,258267  | <b>4,945305</b> ± 0,473665 | <b>4,088107</b> ± 0,430562  |
| Phenylalanine  | 7  | 2,064070 ± 0,078015  | <b>2,384996</b> ± 0,067726  | <b>2,621588</b> ± 0,188365 | <b>3,358885</b> ± 0,133501  |
| Phenylalanine  | 11 | 1,320641 ± 0,270192  | <b>3,181287</b> ± 0,236346  | <b>3,675080</b> ± 0,463349 | <b>4,356938</b> ± 0,437581  |
| Phenylalanine  | 15 | 3,728280 ± 0,285689  | <b>5,114760</b> ± 0,571971  | <b>5,458129</b> ± 0,498026 | <b>6,647143</b> ± 0,027050  |
| Phenylalanine  | 17 | 2,594656 ± 0,414728  | 3,940523 ± 1,295594         | <b>4,359348</b> ± 0,402238 | 3,370093 ± 1,178825         |
| Phenylalanine  | 19 | 1,695398 ± 0,077776  | 2,933804 ± 0,612999         | 2,565835 ± 0,547645        | <b>4,118152</b> ± 0,759125  |
| Phenylalanine  | 24 | 1 ± 0,078875         | <b>1,278820</b> ± 0,062680  | 1,260071 ± 0,223561        | <b>1,445675</b> ± 0,045834  |
| Phosphate      | 0  | 1 ± 0,121307         | <b>1,511234</b> ± 0,129789  | 1,280059 ± 0,175329        | 1,046246 ± 0,064992         |
| Phosphate      | 3  | 1,324221 ± 0,127760  | 1,420196 ± 0,222864         | 1,381177 ± 0,287970        | 1,496344 ± 0,184860         |
| Phosphate      | 7  | 1,073626 ± 0,139629  | 1,177016 ± 0,074139         | 1,199957 ± 0,156711        | <b>1,502989</b> ± 0,137283  |
| Phosphate      | 11 | 0,799842 ± 0,111541  | 0,985169 ± 0,121458         | 1,022902 ± 0,114682        | <b>1,176036</b> ± 0,038642  |
| Phosphate      | 15 | 1,124703 ± 0,101470  | 1,020295 ± 0,088031         | 1,281687 ± 0,147665        | 1,388347 ± 0,095060         |
| Phosphate      | 17 | 4,685818 ± 0,097376  | 3,775632 ± 0,493475         | <b>3,417151</b> ± 0,205104 | <b>2,136640</b> ± 0,138679  |
| Phosphate      | 19 | 1,697594 ± 0,118585  | 1,587016 ± 0,223715         | <b>2,302264</b> ± 0,062191 | <b>2,092916</b> ± 0,064874  |
| Phosphate      | 24 | 1 ± 0,121307         | <b>1,511234</b> ± 0,129789  | 1,280059 ± 0,175329        | 1,046246 ± 0,064992         |
| Proline        | 0  | 1 ± 0,037177         | 1,115762 ± 0,041172         | <b>0,499061</b> ± 0,066055 | <b>0,386217</b> ± 0,074823  |
| Proline        | 3  | 8,094873 ± 1,196264  | <b>4,082247</b> ± 0,667090  | 5,750693 ± 0,893543        | <b>4,841184</b> ± 0,852935  |
| Proline        | 7  | 8,568604 ± 0,380900  | <b>4,802376</b> ± 0,229357  | <b>3,413721</b> ± 0,358900 | <b>4,010302</b> ± 0,672703  |
| Proline        | 11 | 10,152392 ± 1,737024 | 13,873409 ± 3,043722        | <b>5,435759</b> ± 0,770186 | 6,003003 ± 0,890246         |
| Proline        | 15 | 11,231382 ± 1,579232 | 10,547331 ± 2,219522        | <b>6,571822</b> ± 0,858689 | 9,475360 ± 1,263858         |
| Proline        | 17 | 2,624484 ± 0,314161  | <b>0,882777</b> ± 0,069937  | <b>1,579696</b> ± 0,218063 | 3,634669 ± 0,670243         |
| Proline        | 19 | 28,796262 ± 1,397011 | <b>2,216570</b> ± 0,555280  | <b>1,149090</b> ± 0,309468 | <b>1,516142</b> ± 0,361513  |
| Proline        | 24 | 1 ± 0,037177         | 1,115762 ± 0,041172         | <b>0,499061</b> ± 0,066055 | <b>0,386217</b> ± 0,074823  |
| Putrescine     | 0  | 1 ± 0,172588         | 1,262945 ± 0,328510         | 1,150232 ± 0,296824        | 0,895758 ± 0,297105         |
| Putrescine     | 3  | 2,483283 ± 0,145775  | 2,474796 ± 0,244005         | 2,722248 ± 0,298506        | 2,429465 ± 0,645083         |
| Putrescine     | 7  | 4,024963 ± 0,548435  | 4,212916 ± 0,405316         | <b>2,450879</b> ± 0,368029 | 3,956755 ± 0,369901         |
| Putrescine     | 11 | 1,865193 ± 0,317678  | <b>3,900898</b> ± 0,177768  | 2,298694 ± 0,330296        | 1,879834 ± 0,471419         |
| Putrescine     | 15 | 2,908912 ± 0,378981  | 3,074538 ± 0,369866         | 2,588905 ± 0,400073        | 3,558781 ± 0,670750         |
| Putrescine     | 17 | 2,901726 ± 0,111399  | <b>1,999861</b> ± 0,197203  | 2,992528 ± 0,138286        | 3,685065 ± 0,406183         |
| Putrescine     | 19 | 4,041248 ± 0,139203  | 3,651471 ± 0,186215         | <b>2,717525</b> ± 0,132180 | <b>2,847620</b> ± 0,034031  |
| Putrescine     | 24 | 1 ± 0,172588         | 1,262945 ± 0,328510         | 1,150232 ± 0,296824        | 0,895758 ± 0,297105         |
| Pyruvate       | 0  | 1 ± 0,143980         | <b>1,821635</b> ± 0,061897  | <b>1,707406</b> ± 0,208729 | 1,569117 ± 0,260292         |
| Pyruvate       | 3  | 3,264254 ± 0,752994  | 5,476767 ± 0,859501         | <b>6,443262</b> ± 1,181392 | <b>6,004319</b> ± 0,855428  |
| Pyruvate       | 7  | 2,275569 ± 0,477257  | 4,732668 ± 1,080791         | 4,113405 ± 0,772794        | 3,760680 ± 0,594697         |
| Pyruvate       | 11 | 2,075312 ± 0,188028  | <b>3,829923</b> ± 0,332293  | <b>3,476912</b> ± 0,322860 | <b>4,067486</b> ± 0,671054  |
| Pyruvate       | 15 | 2,040489 ± 0,129630  | <b>2,811574</b> ± 0,209324  | <b>2,690339</b> ± 0,200509 | <b>3,462305</b> ± 0,358789  |
| Pyruvate       | 17 | 0,996638 ± 0,071568  | 1,099992 ± 0,104598         | 1,261445 ± 0,085967        | <b>1,422335</b> ± 0,090722  |
| Pyruvate       | 19 | 0,807625 ± 0,073970  | 0,839945 ± 0,214262         | <b>1,130027</b> ± 0,047076 | <b>1,363277</b> ± 0,053116  |
| Pyruvate       | 24 | 1 ± 0,143980         | <b>1,821635</b> ± 0,061897  | <b>1,707406</b> ± 0,208729 | 1,569117 ± 0,260292         |
| Ribose         | 0  | 1 ± 0,094888         | 0,958569 ± 0,066689         | <b>0,660254</b> ± 0,107940 | <b>1,431255</b> ± 0,155278  |
| Ribose         | 3  | 1,339152 ± 0,572029  | 1,618485 ± 0,095618         | <b>2,536375</b> ± 0,320918 | <b>2,642419</b> ± 0,284081  |
| Ribose         | 7  | 2,016302 ± 0,024045  | <b>2,491375</b> ± 0,135447  | 1,254525 ± 0,676739        | <b>2,450560</b> ± 0,203947  |
| Ribose         | 11 | 1,713433 ± 0,231781  | 2,098045 ± 0,664270         | 3,230474 ± n.d.            | 2,396139 ± n.d.             |
| Ribose         | 15 | 2,157259 ± 0,173296  | 2,061566 ± 0,240948         | 2,248503 ± 0,176740        | <b>2,443917</b> ± 0,094161  |
| Ribose         | 17 | 1,581009 ± 0,389262  | 1,547557 ± 0,424034         | 1,832771 ± 0,261720        | 1,273974 ± 0,314405         |
| Ribose         | 19 | 2,130261 ± 0,247104  | 1,745594 ± 0,416311         | 1,421430 ± 0,431843        | 2,000615 ± 0,199052         |
| Ribose         | 24 | 1 ± 0,094888         | 0,958569 ± 0,066689         | <b>0,660254</b> ± 0,107940 | <b>1,431255</b> ± 0,155278  |
| Salicylic Acid | 0  | 1 ± 0,139669         | 0,866176 ± 0,068229         | <b>0,661347</b> ± 0,044007 | <b>0,553824</b> ± 0,083885  |
| Salicylic Acid | 3  | 1,514553 ± 0,124184  | <b>1,159741</b> ± 0,090242  | 1,380683 ± 0,116522        | 1,276734 ± 0,334699         |
| Salicylic Acid | 7  | 1,341027 ± 0,167155  | 1,140693 ± 0,061009         | <b>1,018719</b> ± 0,047346 | <b>1,059254</b> ± 0,072668  |
| Salicylic Acid | 11 | 1,872321 ± 0,442987  | 1,267576 ± 0,038654         | 1,371808 ± 0,152276        | 1,389463 ± 0,028964         |
| Salicylic Acid | 15 | 2,092819 ± 0,297735  | <b>1,296371</b> ± 0,026035  | <b>1,282690</b> ± 0,132574 | <b>1,490336</b> ± 0,127066  |
| Salicylic Acid | 17 | 2,072383 ± 0,642177  | 0,902407 ± 0,463903         | 1,844277 ± 0,262232        | 0,863503 ± 0,552268         |
| Salicylic Acid | 19 | 2,011347 ± 0,617759  | 1,859113 ± 0,303832         | 1,346805 ± 0,480696        | 1,698752 ± 0,328086         |
| Salicylic Acid | 24 | 1 ± 0,139669         | 0,866176 ± 0,068229         | <b>0,661347</b> ± 0,044007 | <b>0,553824</b> ± 0,083885  |
| Serine         | 0  | 1 ± 0,114321         | 0,975249 ± 0,110802         | 0,824976 ± 0,074535        | <b>0,546549</b> ± 0,088629  |
| Serine         | 3  | 9,681299 ± 0,969978  | 8,372157 ± 1,274214         | 7,644293 ± 0,959880        | 8,783798 ± 1,294340         |
| Serine         | 7  | 17,281450 ± 3,594065 | 10,963867 ± 2,664663        | <b>6,423693</b> ± 1,440897 | <b>6,085085</b> ± 0,422898  |
| Serine         | 11 | 11,084275 ± 2,397244 | <b>17,303467</b> ± 1,547882 | 8,927017 ± 1,276745        | 8,259353 ± 1,255576         |
| Serine         | 15 | 12,635092 ± 1,112607 | 11,636805 ± 1,775574        | 8,983093 ± 1,684326        | 11,085219 ± 1,500236        |
| Serine         | 17 | 7,148178 ± 0,574718  | <b>3,074203</b> ± 0,101765  | 6,471189 ± 0,570404        | <b>10,607785</b> ± 0,589910 |
| Serine         | 19 | 7,316571 ± 0,233794  | 5,718487 ± 1,402377         | 5,144799 ± 0,930414        | 6,719375 ± 0,996203         |
| Serine         | 24 | 1 ± 0,114321         | 0,975249 ± 0,110802         | 0,824976 ± 0,074535        | <b>0,546549</b> ± 0,088629  |
| Shikimate      | 0  | 1 ± 0,129881         | <b>1,289313</b> ± 0,076567  | 1,251091 ± 0,105783        | 1,134634 ± 0,053246         |
| Shikimate      | 3  | 1,933811 ± 0,113036  | <b>2,515840</b> ± 0,187745  | <b>2,797592</b> ± 0,152391 | <b>2,883726</b> ± 0,306416  |
| Shikimate      | 7  | 2,183960 ± 0,194596  | <b>2,717167</b> ± 0,109529  | <b>2,712401</b> ± 0,066495 | <b>2,755201</b> ± 0,101987  |
| Shikimate      | 11 | 1,873391 ± 0,093203  | <b>2,514085</b> ± 0,136146  | <b>2,784726</b> ± 0,243652 | 2,892079 ± n.d.             |
| Shikimate      | 15 | 2,792826 ± 0,248480  | <b>3,253680</b> ± 0,167408  | <b>3,373330</b> ± 0,289485 | <b>3,738590</b> ± 0,199810  |
| Shikimate      | 17 | 2,737500 ± 0,117380  | 2,561407 ± 0,143015         | 3,108118 ± 0,130658        | 3,203976 ± 0,236227         |
| Shikimate      | 19 | 2,680490 ± 0,085803  | <b>3,032291</b> ± 0,108351  | 2,753556 ± 0,058978        | <b>3,213767</b> ± 0,075681  |
| Shikimate      | 24 | 1 ± 0,129881         | <b>1,289313</b> ± 0,076567  | 1,251091 ± 0,105783        | 1,134634 ± 0,053246         |
| Sinapic Acid   | 0  | 1 ± 0,097821         | 1,277823 ± 0,137538         | 1,600788 ± 0,375284        | 1,564053 ± 0,361396         |
| Sinapic Acid   | 3  | 4,299583 ± 0,553597  | <b>6,075896</b> ± 0,378334  | <b>6,332518</b> ± 0,455542 | <b>5,648281</b> ± 0,577533  |
| Sinapic Acid   | 7  | 4,609980 ± 0,778046  | 4,414716 ± 0,171419         | 4,207252 ± 0,351185        | 5,134972 ± 0,338296         |
| Sinapic Acid   | 11 | 1,444313 ± 0,175907  | <b>4,576470</b> ± 0,359638  | <b>4,384964</b> ± 0,337046 | <b>4,929382</b> ± 0,092630  |
| Sinapic Acid   | 15 | 2,724445 ± 0,172737  | <b>3,514953</b> ± 0,391504  | <b>3,217525</b> ± 0,226776 | <b>5,096649</b> ± 0,390954  |
| Sinapic Acid   | 17 | 2,712676 ± 0,130629  | <b>1,901927</b> ± 0,126600  | 2,832105 ± 0,171928        | 2,752669 ± 0,194259         |
| Sinapic Acid   | 19 | 3,797224 ± 0,244732  | 3,333300 ± 0,430412         | 3,264133 ± 0,172176        | 3,662528 ± 0,121819         |
| Sinapic Acid   | 24 | 1 ± 0,097821         | 1,277823 ± 0,137538         | 1,600788 ± 0,375284        | 1,564053 ± 0,361396         |
| Succinate      | 0  | 1 ± 0,071920         | 0,811279 ± 0,058845         | 1,050067 ± 0,190412        | 0,895718 ± 0,119824         |
| Succinate      | 3  | 0,569599 ± 0,043920  | <b>0,880521</b> ± 0,053608  | <b>1,145360</b> ± 0,085550 | <b>1,131425</b> ± 0,099706  |
| Succinate      | 7  | 0,370927 ± 0,023869  | <b>0,822319</b> ± 0,083613  | <b>1,211062</b> ± 0,191518 | <b>1,541765</b> ± 0,208410  |
| Succinate      | 11 | 0,443690 ± 0,053972  | <b>0,826415</b> ± 0,085507  | <b>1,195511</b> ± 0,141930 | <b>1,078303</b> ± 0,159035  |
| Succinate      | 15 | 0,673994 ± 0,049202  | <b>1,174987</b> ± 0,070878  | <b>1,641653</b> ± 0,096148 | <b>1,604543</b> ± 0,050316  |
| Succinate      | 17 | 0,814194 ± 0,025782  | 1,147121 ± 0,153272         | <b>1,434524</b> ± 0,080242 | <b>1,786912</b> ± 0,124065  |
| Succinate      | 19 | 1,044588 ± 0,055261  | <b>0,848802</b> ± 0,020566  | 0,977632 ± 0,016556        | <b>1,760621</b> ± 0,029952  |
| Succinate      | 24 | 1 ± 0,071920         | 0,811279 ± 0,058845         | 1,050067 ± 0,190412        | 0,895718 ± 0,119824         |
| Sucrose        | 0  | 1 ± 0,106843         | <b>1,565831</b> ± 0,064267  | 1,318679 ± 0,234416        | 1,186392 ± 0,195787         |
| Sucrose        | 3  | 2,537973 ± 0,546877  | 2,544480 ± 0,207364         | 2,855465 ± 0,274316        | 2,705798 ± 0,321815         |
| Sucrose        | 7  | 2,233746 ± 0,290839  | 2,416768 ± 0,123447         | 2,214567 ± 0,136586        | 2,272658 ± 0,109121         |
| Sucrose        | 11 | 1,566354 ± 0,329375  | <b>2,746819</b> ± 0,084515  | <b>2,651521</b> ± 0,229575 | <b>2,917547</b> ± 0,080310  |
| Sucrose        | 15 | 3,155854 ± 0,341432  | 3,032430 ± 0,155254         | <b>2,632787</b> ± 0,109174 | 3,402067 ± 0,208279         |
| Sucrose        | 17 | 2,443804 ± 0,037359  | <b>1,001621</b> ± 0,036597  | <b>1,203027</b> ± 0,074995 | <b>0,841756</b> ± 0,054434  |
| Sucrose        | 19 | 3,045154 ± 0,136604  | 2,759557 ± 0,092311         | <b>2,288619</b> ± 0,043808 | <b>2,324060</b> ± 0,100069  |

|           |    |          |            |                 |            |                 |            |                 |            |
|-----------|----|----------|------------|-----------------|------------|-----------------|------------|-----------------|------------|
| Sucrose   | 24 | 1        | ± 0,106843 | <b>1,565831</b> | ± 0,064267 | 1,318679        | ± 0,234416 | 1,186392        | ± 0,195787 |
| Threonine | 0  | 1        | ± 0,139579 | <b>0,235604</b> | ± 0,013712 | <b>0,147245</b> | ± 0,013542 | <b>0,121648</b> | ± 0,017529 |
| Threonine | 3  | 4,365366 | ± 0,575196 | <b>1,713871</b> | ± 0,210436 | <b>1,720091</b> | ± 0,410100 | <b>1,544799</b> | ± 0,205595 |
| Threonine | 7  | 5,288547 | ± 1,646018 | 1,711023        | ± 0,418181 | <b>0,720386</b> | ± 0,109946 | <b>0,880911</b> | ± 0,103553 |
| Threonine | 11 | 4,332336 | ± 1,146970 | 2,844260        | ± 0,475118 | <b>1,399877</b> | ± 0,211750 | <b>1,337557</b> | ± 0,275021 |
| Threonine | 15 | 4,999770 | ± 0,624403 | <b>1,940941</b> | ± 0,298494 | <b>1,377005</b> | ± 0,231117 | <b>1,987255</b> | ± 0,247272 |
| Threonine | 17 | 3,481543 | ± 0,122505 | <b>0,935062</b> | ± 0,097383 | <b>0,835117</b> | ± 0,036596 | <b>0,942630</b> | ± 0,051723 |
| Threonine | 19 | 3,004818 | ± 0,103019 | <b>0,855144</b> | ± 0,102310 | <b>0,907581</b> | ± 0,106466 | <b>0,476738</b> | ± 0,029776 |
| Threonine | 24 | 1        | ± 0,139579 | <b>0,235604</b> | ± 0,013712 | <b>0,147245</b> | ± 0,013542 | <b>0,121648</b> | ± 0,017529 |
| Tyrosine  | 0  | 1        | ± 0,167377 | 0,993819        | ± 0,002201 | 0,938705        | ± 0,193058 | <b>1,695936</b> | ± 0,348360 |
| Tyrosine  | 3  | 1,428189 | ± 0,526166 | 1,478787        | ± 0,346359 | 1,241665        | ± 0,261990 | 0,889950        | ± 0,089549 |
| Tyrosine  | 7  | 2,039059 | ± 0,327740 | 1,646626        | ± 0,388352 | <b>1,303791</b> | ± 0,222556 | <b>1,069413</b> | ± 0,113240 |
| Tyrosine  | 11 | 1,360860 | ± n.d.     | 2,398434        | ± 0,712794 | 2,212603        | ± 0,505266 | 2,359696        | ± 0,484093 |
| Tyrosine  | 15 | 1,267415 | ± 0,077035 | <b>2,130040</b> | ± 0,437492 | 1,924142        | ± n.d.     | <b>2,803389</b> | ± 0,652407 |
| Tyrosine  | 17 | 0,455015 | ± 0,085830 | 0,536249        | ± 0,114547 | 0,474725        | ± 0,012386 | 0,604587        | ± 0,021502 |
| Tyrosine  | 19 | 0,742683 | ± 0,058003 | 0,675512        | ± 0,026243 | 0,573546        | ± 0,129387 | <b>0,430681</b> | ± 0,053304 |
| Tyrosine  | 24 | 1        | ± 0,167377 | 0,993819        | ± 0,002201 | 0,938705        | ± 0,193058 | <b>1,695936</b> | ± 0,348360 |
| Uracil    | 0  | 1        | ± 0,148068 | <b>0,516745</b> | ± 0,016191 | <b>0,287125</b> | ± 0,012974 | <b>0,197754</b> | ± 0,026587 |
| Uracil    | 3  | 0,360107 | ± 0,052483 | 0,437499        | ± 0,039805 | <b>0,495057</b> | ± 0,070209 | 0,447056        | ± 0,067030 |
| Uracil    | 7  | 0,499617 | ± 0,123989 | 0,318051        | ± 0,018983 | <b>0,203730</b> | ± 0,034452 | 0,303355        | ± 0,051509 |
| Uracil    | 11 | 0,638301 | ± 0,293409 | 0,314128        | ± 0,021759 | 0,286682        | ± 0,016918 | 0,301403        | ± 0,051609 |
| Uracil    | 15 | 0,570484 | ± 0,133382 | <b>0,289450</b> | ± 0,022153 | <b>0,214630</b> | ± 0,007145 | <b>0,278549</b> | ± 0,007415 |
| Uracil    | 17 | 0,469858 | ± 0,108150 | 0,364478        | ± 0,102513 | 0,451328        | ± 0,079169 | 0,374553        | ± 0,133838 |
| Uracil    | 19 | 0,726612 | ± 0,064944 | <b>0,410882</b> | ± 0,063186 | <b>0,380554</b> | ± 0,082909 | <b>0,374860</b> | ± 0,069639 |
| Uracil    | 24 | 1        | ± 0,148068 | <b>0,516745</b> | ± 0,016191 | <b>0,287125</b> | ± 0,012974 | <b>0,197754</b> | ± 0,026587 |
| Urea      | 0  | 1        | ± 0,060450 | 0,962580        | ± 0,175437 | <b>1,538364</b> | ± 0,184622 | 1,268479        | ± 0,264269 |
| Urea      | 3  | 0,843344 | ± 0,068124 | <b>1,204599</b> | ± 0,192476 | <b>1,591740</b> | ± 0,454161 | 1,500294        | ± 0,473078 |
| Urea      | 7  | 3,230040 | ± 0,811639 | <b>1,666920</b> | ± 0,255029 | <b>0,966903</b> | ± 0,210983 | 2,073637        | ± 0,234735 |
| Urea      | 11 | 1,530559 | ± 0,312261 | <b>3,171654</b> | ± 0,482905 | <b>2,427321</b> | ± 0,493881 | 1,602039        | ± 0,715959 |
| Urea      | 15 | 1,775098 | ± 0,439862 | 1,438925        | ± 0,282497 | <b>1,076526</b> | ± 0,185017 | <b>2,960681</b> | ± 0,545506 |
| Urea      | 17 | 0,697325 | ± 0,178223 | 0,514964        | ± 0,083791 | 0,641986        | ± 0,082941 | 1,085532        | ± 0,080299 |
| Urea      | 19 | 0,960153 | ± 0,091872 | 0,883844        | ± 0,189249 | <b>0,579622</b> | ± 0,117749 | 0,594963        | ± 0,161483 |
| Urea      | 24 | 1        | ± 0,060450 | 0,962580        | ± 0,175437 | <b>1,538364</b> | ± 0,184622 | 1,268479        | ± 0,264269 |
| Valine    | 0  | 1        | ± 0,089558 | <b>1,355333</b> | ± 0,143299 | <b>1,370068</b> | ± 0,116905 | 1,119110        | ± 0,107435 |
| Valine    | 3  | 2,030725 | ± 0,251103 | 2,825752        | ± 0,289813 | <b>4,041260</b> | ± 0,451725 | <b>3,769505</b> | ± 0,688440 |
| Valine    | 7  | 2,565850 | ± 0,268945 | 3,421482        | ± 0,460231 | 3,223551        | ± 0,399660 | 3,650804        | ± 0,777576 |
| Valine    | 11 | 2,867791 | ± 0,354775 | <b>5,247724</b> | ± 0,315140 | <b>4,471159</b> | ± 0,490727 | <b>5,005554</b> | ± 0,597619 |
| Valine    | 15 | 3,442981 | ± 0,287389 | 3,893942        | ± 0,310136 | 3,616299        | ± 0,360238 | <b>4,928051</b> | ± 0,473846 |
| Valine    | 17 | 2,863361 | ± 0,121269 | 3,581391        | ± 0,480825 | 2,768184        | ± 0,211717 | 3,551311        | ± 0,318903 |
| Valine    | 19 | 3,038547 | ± 0,141802 | 3,178674        | ± 0,330614 | <b>2,334329</b> | ± 0,124050 | 2,750010        | ± 0,191789 |
| Valine    | 24 | 1        | ± 0,089558 | <b>1,355333</b> | ± 0,143299 | <b>1,370068</b> | ± 0,116905 | 1,119110        | ± 0,107435 |







|            |     |                    |                           |                           |                          |
|------------|-----|--------------------|---------------------------|---------------------------|--------------------------|
| GABA       | 55  | 0,73596 ± 0,13858  | 0,87926 ± 0,23182         | 0,73266 ± 0,13395         | 0,80729 ± 0,18084        |
| GABA       | 79  | 0,86631 ± 0,03963  | <b>1,00070</b> ± 0,02595  | 0,88811 ± 0,05997         | <b>1,13105</b> ± 0,04085 |
| GABA       | 103 | 1,26260 ± 0,08046  | 1,46214 ± 0,01518         | <b>1,60490</b> ± 0,05057  | 1,53581 ± 0,35596        |
| GABA       | 127 | 1,49529 ± 0,11566  | <b>2,63858</b> ± 0,15239  | <b>2,98372</b> ± 0,17041  | <b>3,00468</b> ± 0,39764 |
| GABA       | 151 | 1,05338 ± 0,04556  | <b>3,94417</b> ± 0,35077  | <b>3,25506</b> ± 0,31405  | <b>3,49092</b> ± 0,24281 |
| GABA       | 175 | 3,37971 ± 0,20460  | 2,94799 ± 0,08005         | 3,36937 ± 0,11996         | <b>1,78794</b> ± 0,06325 |
| GABA       | 199 | 2,36309 ± 0,09979  | <b>2,92426</b> ± 0,07732  | 2,52977 ± 0,45602         | 2,06479 ± 0,74982        |
| Galactose  | 24  | 1,00000 ± 0,10270  | 0,91283 ± 0,09848         | 0,89104 ± 0,12230         | 1,06383 ± 0,15125        |
| Galactose  | 31  | 1,82260 ± 0,34296  | 1,42329 ± 0,18281         | 1,35873 ± 0,21893         | 1,42407 ± 0,22271        |
| Galactose  | 35  | 1,78349 ± 0,23994  | 3,06586 ± 0,58492         | <b>3,72511</b> ± 0,35858  | <b>3,98952</b> ± 0,12722 |
| Galactose  | 39  | 2,19852 ± 0,26218  | 2,37080 ± 0,32593         | 2,66734 ± 0,12956         | 2,69813 ± 0,13283        |
| Galactose  | 51  | n.d. ± n.d.        | n.d. ± n.d.               | n.d. ± n.d.               | n.d. ± n.d.              |
| Galactose  | 55  | 0,88865 ± 0,03887  | 1,04458 ± 0,14939         | 1,13473 ± 0,11771         | <b>1,27990</b> ± 0,02425 |
| Galactose  | 79  | 0,61342 ± 0,05562  | 0,72813 ± 0,05233         | 0,81965 ± 0,06791         | <b>0,79559</b> ± 0,03243 |
| Galactose  | 103 | 0,61484 ± 0,02203  | <b>0,81067</b> ± 0,05961  | 0,73140 ± 0,05007         | 0,49717 ± 0,08059        |
| Galactose  | 127 | 0,37605 ± 0,07933  | <b>0,93883</b> ± 0,06876  | <b>1,11256</b> ± 0,03310  | <b>0,95232</b> ± 0,09920 |
| Galactose  | 151 | 0,32830 ± 0,02147  | <b>1,39974</b> ± 0,06837  | <b>1,66797</b> ± 0,09424  | <b>1,75977</b> ± 0,05651 |
| Galactose  | 175 | 9,74235 ± 0,29933  | <b>5,08532</b> ± 0,07750  | <b>7,91714</b> ± 0,33663  | <b>0,66346</b> ± 0,03516 |
| Galactose  | 199 | 1,22416 ± 0,18347  | <b>2,48539</b> ± 0,05023  | <b>4,41323</b> ± 0,89540  | <b>5,80686</b> ± 0,86001 |
| Gluconate  | 24  | 1,00000 ± 0,09541  | 1,09521 ± 0,05621         | 0,91927 ± 0,13208         | 1,04195 ± 0,10795        |
| Gluconate  | 31  | 1,08401 ± 0,19301  | 1,11193 ± 0,08967         | 0,99925 ± 0,12399         | 1,07667 ± 0,12710        |
| Gluconate  | 35  | 0,97338 ± 0,20552  | 1,05423 ± 0,26822         | 1,20581 ± 0,26461         | 1,14485 ± 0,24361        |
| Gluconate  | 39  | 0,93146 ± 0,12953  | 1,14028 ± 0,18374         | <b>1,32961</b> ± 0,11349  | <b>1,33449</b> ± 0,14475 |
| Gluconate  | 51  | n.d. ± n.d.        | n.d. ± n.d.               | n.d. ± n.d.               | n.d. ± n.d.              |
| Gluconate  | 55  | 0,99303 ± 0,08094  | 1,04981 ± 0,15922         | 1,00336 ± 0,11613         | <b>1,37785</b> ± 0,11125 |
| Gluconate  | 79  | 0,65703 ± 0,12519  | 0,62702 ± 0,09476         | 0,65948 ± 0,10141         | 1,03070 ± 0,14975        |
| Gluconate  | 103 | 0,88457 ± 0,10215  | 0,89319 ± 0,06562         | 0,66187 ± 0,05142         | <b>0,46134</b> ± 0,09766 |
| Gluconate  | 127 | 0,55425 ± 0,06864  | 0,54414 ± 0,11923         | <b>1,01468</b> ± 0,10274  | 0,70383 ± 0,06564        |
| Gluconate  | 151 | 0,55402 ± 0,08175  | 0,78482 ± 0,06766         | <b>1,05956</b> ± 0,06923  | <b>1,13035</b> ± 0,04512 |
| Gluconate  | 175 | 3,91504 ± 0,21630  | <b>1,52221</b> ± 0,16588  | <b>2,18188</b> ± 0,36530  | <b>0,87015</b> ± 0,03880 |
| Gluconate  | 199 | 0,98538 ± 0,16785  | <b>1,60838</b> ± 0,14851  | 2,77554 ± 0,78502         | <b>5,30456</b> ± 0,55232 |
| Glucoamine | 24  | 1,00000 ± 0,16988  | <b>0,60030</b> ± 0,15298  | <b>0,54592</b> ± 0,11047  | 0,95469 ± 0,23246        |
| Glucoamine | 31  | 0,51149 ± 0,09125  | 0,57468 ± 0,11892         | <b>0,74503</b> ± 0,05180  | <b>0,77821</b> ± 0,10763 |
| Glucoamine | 35  | 1,06608 ± 0,22766  | 0,68649 ± 0,25165         | 0,74500 ± 0,14945         | 0,53077 ± 0,11182        |
| Glucoamine | 39  | 1,36290 ± 0,26667  | 0,87160 ± 0,33079         | <b>0,49007</b> ± 0,09614  | <b>0,74675</b> ± 0,09969 |
| Glucoamine | 51  | n.d. ± n.d.        | n.d. ± n.d.               | n.d. ± n.d.               | n.d. ± n.d.              |
| Glucoamine | 55  | 0,50585 ± 0,06826  | 0,61779 ± 0,09461         | 0,57046 ± 0,20997         | 0,34568 ± 0,09279        |
| Glucoamine | 79  | 0,23051 ± 0,05351  | 0,19302 ± 0,02023         | 0,15796 ± 0,01188         | 0,18223 ± n.d.           |
| Glucoamine | 103 | 0,29230 ± 0,04052  | <b>0,14752</b> ± 0,02622  | n.d. ± n.d.               | n.d. ± n.d.              |
| Glucoamine | 127 | 0,18785 ± 0,00236  | 0,30536 ± 0,06516         | <b>0,64519</b> ± 0,06965  | 1,06154 ± n.d.           |
| Glucoamine | 151 | 0,11166 ± 0,01417  | <b>0,35806</b> ± 0,07808  | <b>0,43671</b> ± 0,07056  | <b>0,32324</b> ± 0,07832 |
| Glucoamine | 175 | 0,23062 ± 0,03895  | 0,29101 ± 0,14290         | 0,27837 ± 0,02548         | 0,11735 ± 0,03044        |
| Glucoamine | 199 | 0,16036 ± 0,02529  | 0,14400 ± 0,03518         | 0,16072 ± 0,02979         | 0,23877 ± 0,03944        |
| Glucose    | 24  | 1,00000 ± 0,11905  | <b>0,55341</b> ± 0,16260  | <b>0,66740</b> ± 0,11306  | 0,96404 ± 0,19008        |
| Glucose    | 31  | 0,23351 ± 0,06804  | 0,27508 ± 0,06092         | <b>0,40291</b> ± 0,03077  | <b>0,62142</b> ± 0,06997 |
| Glucose    | 35  | 0,70237 ± 0,14009  | 0,78024 ± 0,20106         | 0,81613 ± 0,20170         | 0,71116 ± 0,11113        |
| Glucose    | 39  | 0,61386 ± 0,07596  | 0,60143 ± 0,19545         | 0,39381 ± 0,10686         | 0,50191 ± 0,09157        |
| Glucose    | 51  | n.d. ± n.d.        | n.d. ± n.d.               | n.d. ± n.d.               | n.d. ± n.d.              |
| Glucose    | 55  | 0,27268 ± 0,03388  | 0,35157 ± 0,04068         | 0,37851 ± 0,17899         | 0,27126 ± 0,08823        |
| Glucose    | 79  | 0,15010 ± 0,00785  | <b>0,10654</b> ± 0,00686  | <b>0,10083</b> ± 0,00502  | <b>0,03184</b> ± 0,00183 |
| Glucose    | 103 | 0,05906 ± 0,02147  | 0,03918 ± 0,00454         | 0,02949 ± 0,00330         | 0,02237 ± 0,00232        |
| Glucose    | 127 | 0,02385 ± 0,00227  | 0,02723 ± 0,00275         | <b>0,03567</b> ± 0,00323  | 0,03312 ± 0,00315        |
| Glucose    | 151 | 0,06760 ± 0,01147  | <b>0,13121</b> ± 0,01117  | <b>0,19158</b> ± 0,01488  | <b>0,15929</b> ± 0,02424 |
| Glucose    | 175 | 0,19031 ± 0,00368  | <b>0,09560</b> ± 0,00185  | <b>0,14051</b> ± 0,00348  | <b>0,05875</b> ± 0,00782 |
| Glucose    | 199 | 0,09795 ± 0,02485  | 0,09145 ± 0,00477         | 0,10741 ± 0,02116         | <b>0,17294</b> ± 0,00720 |
| Glucose-6P | 24  | 1,00000 ± 0,28165  | 1,24112 ± 0,23695         | 1,14254 ± 0,17418         | 1,04540 ± 0,12855        |
| Glucose-6P | 31  | 0,26655 ± 0,02234  | 0,28087 ± 0,03489         | <b>0,55701</b> ± 0,03381  | <b>0,42674</b> ± 0,05811 |
| Glucose-6P | 35  | n.d. ± n.d.        | n.d. ± n.d.               | n.d. ± n.d.               | n.d. ± n.d.              |
| Glucose-6P | 39  | 0,36884 ± n.d.     | 0,65050 ± 0,00708         | 0,35762 ± 0,00072         | 0,43336 ± n.d.           |
| Glucose-6P | 51  | n.d. ± n.d.        | n.d. ± n.d.               | n.d. ± n.d.               | n.d. ± n.d.              |
| Glucose-6P | 55  | 0,24718 ± n.d.     | 0,36451 ± 0,00219         | 0,28828 ± 0,05374         | n.d. ± n.d.              |
| Glucose-6P | 79  | n.d. ± n.d.        | n.d. ± n.d.               | n.d. ± n.d.               | n.d. ± n.d.              |
| Glucose-6P | 103 | 0,33076 ± 0,01176  | 0,35175 ± n.d.            | 0,46362 ± n.d.            | n.d. ± n.d.              |
| Glucose-6P | 127 | n.d. ± n.d.        | 0,42458 ± 0,03644         | 0,66949 ± 0,09343         | 0,48032 ± n.d.           |
| Glucose-6P | 151 | n.d. ± n.d.        | 0,76183 ± 0,13289         | 1,50371 ± 0,21416         | 1,07281 ± 0,01388        |
| Glucose-6P | 175 | 0,99861 ± 0,11286  | 1,03339 ± 0,11085         | 0,73343 ± 0,03779         | <b>0,29747</b> ± 0,05151 |
| Glucose-6P | 199 | 0,35183 ± 0,01768  | <b>0,76224</b> ± 0,07495  | 0,43689 ± 0,13207         | <b>0,77534</b> ± 0,05291 |
| Glutamate  | 24  | 1,00000 ± 0,22551  | 0,60601 ± 0,10760         | <b>0,38441</b> ± 0,11445  | <b>0,34505</b> ± 0,07253 |
| Glutamate  | 31  | 2,71046 ± 0,58116  | <b>0,99989</b> ± 0,15526  | 1,63926 ± 0,30375         | <b>0,90220</b> ± 0,19499 |
| Glutamate  | 35  | 0,21376 ± 0,16781  | 0,17730 ± 0,09622         | 0,19505 ± 0,06863         | 0,20026 ± 0,15056        |
| Glutamate  | 39  | 5,18553 ± 1,22190  | 4,52030 ± 1,08579         | 3,10670 ± 0,63204         | 2,97079 ± 0,70304        |
| Glutamate  | 51  | 9,70265 ± 0,77004  | 7,95220 ± 0,29913         | <b>4,43306</b> ± 1,00579  | <b>2,51304</b> ± 0,51420 |
| Glutamate  | 55  | 3,39371 ± 0,88497  | 3,33842 ± 0,87589         | 3,51947 ± 1,06230         | 2,65935 ± 0,82354        |
| Glutamate  | 79  | 4,61437 ± 0,16066  | 4,38538 ± 0,10412         | 3,79985 ± 0,31529         | 4,68495 ± 0,20802        |
| Glutamate  | 103 | 8,17061 ± 0,43034  | <b>6,97186</b> ± 0,06344  | <b>5,90917</b> ± 0,25696  | <b>4,34467</b> ± 1,32718 |
| Glutamate  | 127 | 10,11739 ± 0,84031 | 7,80578 ± 0,46808         | 8,42021 ± 0,54464         | 5,75116 ± 1,67875        |
| Glutamate  | 151 | 6,73403 ± 0,57057  | <b>10,50424</b> ± 0,75943 | <b>11,02572</b> ± 1,34954 | 5,83512 ± 1,26474        |
| Glutamate  | 175 | 7,03981 ± 0,39563  | 7,04134 ± 0,66724         | 6,56967 ± 0,53353         | 6,38863 ± 1,65589        |
| Glutamate  | 199 | 12,82040 ± 0,24248 | <b>7,77795</b> ± 0,30600  | <b>4,82689</b> ± 1,23881  | <b>2,31465</b> ± 0,74357 |
| Glutamine  | 24  | 1,00000 ± 0,07517  | 1,05556 ± 0,06176         | 1,08380 ± 0,07985         | 0,97507 ± 0,08646        |
| Glutamine  | 31  | 1,57273 ± 0,09603  | 1,49994 ± 0,10122         | 1,57218 ± 0,08979         | <b>1,27556</b> ± 0,05758 |
| Glutamine  | 35  | 1,22645 ± 0,12747  | 1,30581 ± 0,24970         | <b>1,83760</b> ± 0,09607  | 1,31887 ± 0,11906        |
| Glutamine  | 39  | 1,79716 ± 0,36925  | 1,64188 ± 0,23133         | 1,63790 ± 0,19828         | 1,56680 ± 0,24344        |
| Glutamine  | 51  | 0,58701 ± 0,04451  | <b>0,76452</b> ± 0,04354  | 0,79571 ± 0,08990         | 0,70071 ± 0,02543        |
| Glutamine  | 55  | 1,30546 ± 0,30908  | 1,06448 ± 0,08377         | 2,31964 ± 0,74540         | 1,06217 ± 0,18806        |
| Glutamine  | 79  | 0,75310 ± 0,07298  | 0,89195 ± 0,15798         | 0,83814 ± 0,03573         | <b>1,95414</b> ± 0,15262 |
| Glutamine  | 103 | 1,19043 ± 0,25822  | 2,04014 ± 0,56828         | 1,97238 ± 0,42097         | 2,85638 ± 1,17300        |
| Glutamine  | 127 | 3,00133 ± 0,25253  | 2,68791 ± 0,25305         | 2,56442 ± 0,38975         | 4,79910 ± 1,50431        |
| Glutamine  | 151 | 0,71151 ± 0,20165  | <b>2,87562</b> ± 0,55365  | 1,26527 ± 0,18989         | 1,04794 ± 0,07795        |
| Glutamine  | 175 | 1,06002 ± 0,29853  | 1,33639 ± 0,03234         | 1,76336 ± 0,25091         | 1,02008 ± 0,24178        |
| Glutamine  | 199 | n.d. ± n.d.        | n.d. ± n.d.               | 1,40914 ± 0,17058         | 0,53203 ± 0,11584        |
| Glycerate  | 24  | 1,00000 ± 0,06443  | <b>0,54185</b> ± 0,06235  | <b>0,70049</b> ± 0,07780  | 0,77507 ± 0,12543        |
| Glycerate  | 31  | 0,62221 ± 0,07267  | 0,47351 ± 0,03472         | 0,61584 ± 0,05129         | 0,59617 ± 0,08393        |
| Glycerate  | 35  | 1,08873 ± 0,21720  | 1,19903 ± 0,33219         | 0,88683 ± 0,23738         | 0,71801 ± 0,08056        |













|        |     |                     |                             |                             |                             |
|--------|-----|---------------------|-----------------------------|-----------------------------|-----------------------------|
| Valine | 55  | 31,70300 ± 6,38173  | 43,60412 ± 5,31425          | 46,36637 ± 6,98966          | 41,72045 ± 11,06337         |
| Valine | 79  | 51,23361 ± 2,24964  | <b>61,96361</b> ± 1,76177   | 55,98996 ± 0,35649          | <b>79,02637</b> ± 4,50439   |
| Valine | 103 | 81,85682 ± 4,32068  | <b>99,01844</b> ± 3,85702   | 85,08980 ± 5,72975          | 77,35055 ± 19,21213         |
| Valine | 127 | 90,18022 ± 5,19575  | <b>170,23481</b> ± 9,33914  | <b>269,74744</b> ± 12,49864 | <b>230,77671</b> ± 35,91957 |
| Valine | 151 | 53,67791 ± 2,58263  | <b>209,18576</b> ± 15,41263 | <b>205,97104</b> ± 12,54972 | <b>222,65798</b> ± 4,21244  |
| Valine | 175 | 171,36505 ± 9,09883 | 169,19990 ± 7,62314         | <b>209,35009</b> ± 6,21875  | <b>95,47696</b> ± 8,76512   |
| Valine | 199 | 192,48685 ± 9,10245 | <b>153,47242</b> ± 4,70297  | 166,97612 ± 20,76482        | 143,37014 ± 21,63809        |

## Supplementary Table S4. Fahrenstich et al., 2007

*In vitro* metabolic complementation assays. Complete dataset of metabolite abundance (relative to the corresponding wild-type level in water) after three days in darkness. Values are presented as the mean  $\pm$  SE of replicates of pools of at least 20 plantlets each. Those that are significantly different from the respective wild-type as determined by the Student's *t* test ( $P < 0.05$ ) are set into bold type. n.d. indicates compounds that were not detected.

| Substance           | condition           | wt        |                | ME <sub>m</sub> 2 |                | ME <sub>m</sub> 4 |                | ME <sub>m</sub> 5 |                |
|---------------------|---------------------|-----------|----------------|-------------------|----------------|-------------------|----------------|-------------------|----------------|
|                     |                     | Mean      | SE             | Mean              | SE             | Mean              | SE             | Mean              | SE             |
| 2-Oxoglutarate      | 3d H <sub>2</sub> O | 1,00000   | $\pm$ 0,04000  | <b>0,27673</b>    | $\pm$ 0,02589  | <b>0,20431</b>    | $\pm$ 0,03399  | <b>0,22675</b>    | $\pm$ 0,01476  |
| 2-Oxoglutarate      | 3d 1% Gluc          | 0,25773   | $\pm$ 0,01950  | <b>0,09038</b>    | $\pm$ 0,01567  | 0,22665           | $\pm$ 0,01447  | <b>0,17283</b>    | $\pm$ 0,00759  |
| 3-PGA               | 3d H <sub>2</sub> O | 1,00000   | $\pm$ 0,18638  | 0,74967           | $\pm$ 0,16440  | 0,68098           | $\pm$ 0,15758  | <b>0,49914</b>    | $\pm$ 0,01940  |
| 3-PGA               | 3d 1% Gluc          | 3,26302   | $\pm$ 0,19779  | <b>1,49114</b>    | $\pm$ 0,23208  | <b>1,89983</b>    | $\pm$ 0,28711  | <b>1,51024</b>    | $\pm$ 0,24665  |
| 5-Oxo-Proline       | 3d H <sub>2</sub> O | 1,00000   | $\pm$ 0,02786  | <b>0,59680</b>    | $\pm$ 0,05058  | <b>0,70031</b>    | $\pm$ 0,04411  | <b>0,54730</b>    | $\pm$ 0,04110  |
| 5-Oxo-Proline       | 3d 1% Gluc          | 1,87259   | $\pm$ 0,13150  | <b>1,18329</b>    | $\pm$ 0,13585  | 1,79766           | $\pm$ 0,07621  | <b>1,46602</b>    | $\pm$ 0,07053  |
| Adenine             | 3d H <sub>2</sub> O | 1,00000   | $\pm$ 0,12509  | <b>1,59754</b>    | $\pm$ 0,02062  | 1,44110           | $\pm$ 0,16263  | 0,79984           | $\pm$ 0,02630  |
| Adenine             | 3d 1% Gluc          | 1,86629   | $\pm$ 0,69098  | 0,78738           | $\pm$ 0,05211  | 2,41973           | $\pm$ 0,13456  | 2,04617           | $\pm$ 0,80609  |
| Alanine             | 3d H <sub>2</sub> O | 1,00000   | $\pm$ 0,15867  | <b>9,88293</b>    | $\pm$ 1,86380  | <b>65,16973</b>   | $\pm$ 14,48528 | <b>58,12274</b>   | $\pm$ 11,63042 |
| Alanine             | 3d 1% Gluc          | 15,89552  | $\pm$ 2,79288  | <b>29,43537</b>   | $\pm$ 5,93863  | <b>110,69319</b>  | $\pm$ 9,55069  | <b>106,84843</b>  | $\pm$ 7,15331  |
| Asparagine          | 3d H <sub>2</sub> O | 1,00000   | $\pm$ 0,03217  | <b>0,12957</b>    | $\pm$ 0,02844  | <b>0,02135</b>    | $\pm$ 0,00256  | <b>0,01076</b>    | $\pm$ 0,00864  |
| Asparagine          | 3d 1% Gluc          | 0,97066   | $\pm$ 0,07251  | <b>0,16674</b>    | $\pm$ 0,05145  | <b>0,58763</b>    | $\pm$ 0,09566  | <b>0,16981</b>    | $\pm$ 0,12721  |
| Aspartate           | 3d H <sub>2</sub> O | 1,00000   | $\pm$ 0,30626  | 0,41019           | $\pm$ 0,04506  | 0,57926           | $\pm$ 0,01025  | <b>0,16515</b>    | $\pm$ 0,07354  |
| Aspartate           | 3d 1% Gluc          | 5,13600   | $\pm$ 0,09179  | <b>1,36111</b>    | $\pm$ 0,09428  | <b>2,22518</b>    | $\pm$ 0,53160  | <b>1,94066</b>    | $\pm$ 0,41521  |
| Benzoate            | 3d H <sub>2</sub> O | 1,00000   | $\pm$ 0,00000  | 2,53515           | $\pm$ 0,48991  | 6,80294           | $\pm$ 1,34305  | 7,28781           | $\pm$ 0,15057  |
| Benzoate            | 3d 1% Gluc          | 3,76314   | $\pm$ 0,57647  | 3,15169           | $\pm$ 0,00000  | <b>10,87201</b>   | $\pm$ 1,17712  | 1,34829           | $\pm$ 0,00000  |
| beta-Alanine        | 3d H <sub>2</sub> O | 1,00000   | $\pm$ 0,04462  | <b>4,17618</b>    | $\pm$ 0,37889  | <b>8,26955</b>    | $\pm$ 0,42666  | <b>4,43312</b>    | $\pm$ 0,40249  |
| beta-Alanine        | 3d 1% Gluc          | 1,79276   | $\pm$ 0,13476  | <b>2,50666</b>    | $\pm$ 0,24785  | <b>4,19789</b>    | $\pm$ 0,18143  | <b>3,19326</b>    | $\pm$ 0,25315  |
| beta-Hydroxybutyrat | 3d H <sub>2</sub> O | 1,00000   | $\pm$ 0,31895  | <b>114,94895</b>  | $\pm$ 3,34791  | <b>179,68444</b>  | $\pm$ 8,49134  | <b>107,35194</b>  | $\pm$ 6,33583  |
| beta-Hydroxybutyrat | 3d 1% Gluc          | 0,73823   | $\pm$ 0,12163  | <b>23,42242</b>   | $\pm$ 2,01182  | <b>54,12329</b>   | $\pm$ 1,45410  | <b>34,64870</b>   | $\pm$ 1,38764  |
| Citrate/Isocitrate  | 3d H <sub>2</sub> O | 1,00000   | $\pm$ 0,03869  | <b>0,56796</b>    | $\pm$ 0,03776  | <b>1,43277</b>    | $\pm$ 0,02624  | 0,84773           | $\pm$ 0,04913  |
| Citrate/Isocitrate  | 3d 1% Gluc          | 0,41636   | $\pm$ 0,02594  | <b>0,21219</b>    | $\pm$ 0,02656  | 0,36484           | $\pm$ 0,00528  | 0,39111           | $\pm$ 0,04090  |
| Citrulline          | 3d H <sub>2</sub> O | 1,00000   | $\pm$ 0,06705  | 0,68084           | $\pm$ 0,20155  | <b>0,20412</b>    | $\pm$ 0,08660  | 0,05720           | $\pm$ 0,00000  |
| Citrulline          | 3d 1% Gluc          | 0,53077   | $\pm$ 0,10083  | 0,53969           | $\pm$ 0,34792  | <b>4,35267</b>    | $\pm$ 0,99979  | 3,23804           | $\pm$ 0,00000  |
| Fructose            | 3d H <sub>2</sub> O | 1,00000   | $\pm$ 0,28891  | 0,80641           | $\pm$ 0,14754  | <b>2,16823</b>    | $\pm$ 0,34028  | 0,61449           | $\pm$ 0,15636  |
| Fructose            | 3d 1% Gluc          | 561,12914 | $\pm$ 42,31796 | <b>286,17026</b>  | $\pm$ 35,52192 | <b>334,53328</b>  | $\pm$ 31,36641 | 532,46116         | $\pm$ 32,94726 |
| Fructose-6P         | 3d H <sub>2</sub> O | 1,00000   | $\pm$ 0,10941  | <b>2,08215</b>    | $\pm$ 0,38522  | 0,78468           | $\pm$ 0,06758  | 0,50866           | $\pm$ 0,00000  |
| Fructose-6P         | 3d 1% Gluc          | 7,16642   | $\pm$ 1,10713  | 5,06097           | $\pm$ 0,89912  | 6,06442           | $\pm$ 0,28019  | 5,51035           | $\pm$ 0,47025  |
| Fumarate            | 3d H <sub>2</sub> O | 1,00000   | $\pm$ 0,03974  | <b>0,32977</b>    | $\pm$ 0,00825  | <b>0,34381</b>    | $\pm$ 0,02027  | <b>0,27143</b>    | $\pm$ 0,01020  |
| Fumarate            | 3d 1% Gluc          | 2,67801   | $\pm$ 0,08475  | <b>1,37089</b>    | $\pm$ 0,14844  | <b>1,52357</b>    | $\pm$ 0,04604  | <b>1,85752</b>    | $\pm$ 0,06687  |
| GABA                | 3d H <sub>2</sub> O | 1,00000   | $\pm$ 0,09285  | 0,96255           | $\pm$ 0,08965  | 1,00123           | $\pm$ 0,13641  | 0,85826           | $\pm$ 0,08247  |
| GABA                | 3d 1% Gluc          | 1,55469   | $\pm$ 0,12163  | <b>1,01947</b>    | $\pm$ 0,14366  | <b>2,00254</b>    | $\pm$ 0,10208  | 1,62145           | $\pm$ 0,04352  |
| Galaktose           | 3d H <sub>2</sub> O | 1,00000   | $\pm$ 0,24095  | 1,72963           | $\pm$ 0,37829  | <b>4,97694</b>    | $\pm$ 0,32439  | <b>2,89610</b>    | $\pm$ 0,60191  |
| Galaktose           | 3d 1% Gluc          | 34,86047  | $\pm$ 2,55410  | 0,00000           | $\pm$ 0,00000  | <b>25,84663</b>   | $\pm$ 2,59403  | 36,20807          | $\pm$ 2,65552  |
| Glucuronate         | 3d H <sub>2</sub> O | 1,00000   | $\pm$ 0,59311  | 0,34717           | $\pm$ 0,01356  | 0,62280           | $\pm$ 0,11691  | 0,32292           | $\pm$ 0,02801  |
| Glucuronate         | 3d 1% Gluc          | 12,00386  | $\pm$ 0,88227  | <b>38,92935</b>   | $\pm$ 5,64454  | <b>72,96344</b>   | $\pm$ 2,00755  | <b>6,54806</b>    | $\pm$ 0,35583  |
| Glucose             | 3d H <sub>2</sub> O | 1,00000   | $\pm$ 0,06261  | <b>1,97626</b>    | $\pm$ 0,21434  | <b>9,18489</b>    | $\pm$ 0,60979  | <b>2,16295</b>    | $\pm$ 0,13978  |
| Glucose             | 3d 1% Gluc          | 699,38693 | $\pm$ 36,66541 | 559,13316         | $\pm$ 69,98532 | <b>378,88338</b>  | $\pm$ 38,34575 | <b>457,93620</b>  | $\pm$ 25,12799 |
| Glucose-6P          | 3d H <sub>2</sub> O | 1,00000   | $\pm$ 0,04998  | <b>3,03827</b>    | $\pm$ 0,13663  | 0,87987           | $\pm$ 0,00000  | <b>0,32701</b>    | $\pm$ 0,05477  |
| Glucose-6P          | 3d 1% Gluc          | 4,42702   | $\pm$ 0,80060  | <b>3,38573</b>    | $\pm$ 0,34446  | 4,96274           | $\pm$ 0,40847  | <b>4,78117</b>    | $\pm$ 0,21972  |
| Glutamate           | 3d H <sub>2</sub> O | 1,00000   | $\pm$ 0,30132  | 0,77034           | $\pm$ 0,18627  | 0,46926           | $\pm$ 0,19349  | 0,51634           | $\pm$ 0,17962  |
| Glutamate           | 3d 1% Gluc          | 1,24918   | $\pm$ 0,08412  | <b>0,90147</b>    | $\pm$ 0,07860  | 1,15661           | $\pm$ 0,04843  | 1,13276           | $\pm$ 0,06813  |
| Glutamine           | 3d H <sub>2</sub> O | 1,00000   | $\pm$ 0,19324  | 1,41483           | $\pm$ 0,12158  | 1,68836           | $\pm$ 0,20811  | 0,91763           | $\pm$ 0,28372  |
| Glutamine           | 3d 1% Gluc          | 43,11422  | $\pm$ 17,22983 | 1,82361           | $\pm$ 0,34740  | 1,43618           | $\pm$ 0,03120  | 1,14273           | $\pm$ 0,23878  |
| Glycerate           | 3d H <sub>2</sub> O | 1,00000   | $\pm$ 0,03204  | <b>0,57543</b>    | $\pm$ 0,05191  | 1,17113           | $\pm$ 0,08899  | <b>0,67801</b>    | $\pm$ 0,11369  |
| Glycerate           | 3d 1% Gluc          | 35,18873  | $\pm$ 1,61762  | <b>22,59735</b>   | $\pm$ 2,42448  | 36,37111          | $\pm$ 2,92016  | 29,69801          | $\pm$ 1,91147  |
| Glycerol            | 3d H <sub>2</sub> O | 1,00000   | $\pm$ 0,31353  | 1,53477           | $\pm$ 0,03243  | <b>2,92075</b>    | $\pm$ 0,12547  | 1,58156           | $\pm$ 0,14124  |
| Glycerol            | 3d 1% Gluc          | 0,41267   | $\pm$ 0,01324  | <b>1,37362</b>    | $\pm$ 0,15807  | <b>2,55804</b>    | $\pm$ 0,24614  | <b>0,77588</b>    | $\pm$ 0,02749  |
| Glycine             | 3d H <sub>2</sub> O | 1,00000   | $\pm$ 0,05633  | <b>1,33637</b>    | $\pm$ 0,08236  | <b>2,94702</b>    | $\pm$ 0,07988  | <b>1,81502</b>    | $\pm$ 0,07750  |
| Glycine             | 3d 1% Gluc          | 2,68487   | $\pm$ 0,14108  | 2,69645           | $\pm$ 0,23382  | <b>5,00656</b>    | $\pm$ 0,18926  | 3,27585           | $\pm$ 0,33636  |
| Glycolate           | 3d H <sub>2</sub> O | 1,00000   | $\pm$ 0,04530  | 0,00000           | $\pm$ 0,00000  | 0,96542           | $\pm$ 0,19259  | 0,00000           | $\pm$ 0,00000  |
| Glycolate           | 3d 1% Gluc          | 2,80501   | $\pm$ 0,90180  | 1,22298           | $\pm$ 0,12022  | 2,17475           | $\pm$ 0,28670  | 1,55709           | $\pm$ 0,20288  |
| Glyoxylate          | 3d H <sub>2</sub> O | 1,00000   | $\pm$ 0,02178  | <b>1,27599</b>    | $\pm$ 0,09852  | 2,04832           | $\pm$ 0,47323  | 1,22492           | $\pm$ 0,25191  |
| Glyoxylate          | 3d 1% Gluc          | 2,15267   | $\pm$ 0,39970  | 1,50219           | $\pm$ 0,15620  | <b>3,46834</b>    | $\pm$ 0,19532  | 2,46144           | $\pm$ 0,39754  |
| Histidine           | 3d H <sub>2</sub> O | 1,00000   | $\pm$ 0,00000  | 1,37395           | $\pm$ 0,26522  | 1,28191           | $\pm$ 0,29774  | 1,13457           | $\pm$ 0,11345  |
| Histidine           | 3d 1% Gluc          | 14,49668  | $\pm$ 3,68606  | 12,30619          | $\pm$ 1,66125  | 8,03020           | $\pm$ 2,66048  | 8,76363           | $\pm$ 1,28640  |
| Inositol            | 3d H <sub>2</sub> O | 1,00000   | $\pm$ 0,04558  | 1,01192           | $\pm$ 0,22567  | <b>3,72483</b>    | $\pm$ 0,15685  | <b>2,63593</b>    | $\pm$ 0,16741  |
| Inositol            | 3d 1% Gluc          | 39,90059  | $\pm$ 1,57207  | <b>21,16661</b>   | $\pm$ 2,25585  | <b>19,58917</b>   | $\pm$ 0,55915  | <b>27,16826</b>   | $\pm$ 1,08091  |
| Isoleucine          | 3d H <sub>2</sub> O | 1,00000   | $\pm$ 0,08275  | <b>1,60027</b>    | $\pm$ 0,13096  | <b>2,53620</b>    | $\pm$ 0,22023  | 1,14012           | $\pm$ 0,37292  |
| Isoleucine          | 3d 1% Gluc          | 8,23689   | $\pm$ 0,44971  | <b>3,91821</b>    | $\pm$ 0,57639  | <b>6,45548</b>    | $\pm$ 0,20451  | 6,83556           | $\pm$ 0,63643  |
| Lactate             | 3d H <sub>2</sub> O | 1,00000   | $\pm$ 0,33774  | 0,18375           | $\pm$ 0,01770  | 0,95583           | $\pm$ 0,10096  | 0,27493           | $\pm$ 0,07965  |
| Lactate             | 3d 1% Gluc          | 0,46470   | $\pm$ 0,02970  | <b>1,22398</b>    | $\pm$ 0,10528  | <b>2,61364</b>    | $\pm$ 0,12587  | 0,74516           | $\pm$ 0,21841  |
| Lactose/Raffinose   | 3d H <sub>2</sub> O | 1,00000   | $\pm$ 0,00000  | 0,00000           | $\pm$ 0,00000  | 0,00000           | $\pm$ 0,00000  | 0,00000           | $\pm$ 0,00000  |
| Lactose/Raffinose   | 3d 1% Gluc          | 1,02038   | $\pm$ 0,24244  | 1,16100           | $\pm$ 0,19577  | 1,33738           | $\pm$ 0,21202  | 1,72836           | $\pm$ 0,21383  |
| Leucine             | 3d H <sub>2</sub> O | 1,00000   | $\pm$ 0,04876  | <b>2,46493</b>    | $\pm$ 0,42880  | <b>6,90450</b>    | $\pm$ 1,63393  | <b>3,19074</b>    | $\pm$ 0,67138  |
| Leucine             | 3d 1% Gluc          | 102,51037 | $\pm$ 6,26723  | <b>32,57128</b>   | $\pm$ 2,10192  | <b>41,75105</b>   | $\pm$ 9,13840  | <b>42,29134</b>   | $\pm$ 2,63805  |
| Lysine              | 3d H <sub>2</sub> O | 1,00000   | $\pm$ 0,35465  | 0,83767           | $\pm$ 0,16641  | 0,82580           | $\pm$ 0,16766  | 0,51100           | $\pm$ 0,07278  |
| Lysine              | 3d 1% Gluc          | 3,61209   | $\pm$ 0,73214  | 2,12867           | $\pm$ 0,70783  | <b>1,25059</b>    | $\pm$ 0,29401  | 2,30611           | $\pm$ 0,77180  |
| Malate              | 3d H <sub>2</sub> O | 1,00000   | $\pm$ 0,10769  | <b>0,21884</b>    | $\pm$ 0,02899  | <b>0,10941</b>    | $\pm$ 0,01579  | <b>0,11758</b>    | $\pm$ 0,01261  |
| Malate              | 3d 1% Gluc          | 1,19128   | $\pm$ 0,05172  | <b>0,58130</b>    | $\pm$ 0,06992  | <b>0,96805</b>    | $\pm$ 0,02820  | 1,12362           | $\pm$ 0,02572  |
| Maleate             | 3d H <sub>2</sub> O | 1,00000   | $\pm$ 0,04466  | <b>0,43204</b>    | $\pm$ 0,10925  | <b>0,71107</b>    | $\pm$ 0,05332  | <b>0,47177</b>    | $\pm$ 0,06079  |
| Maleate             | 3d 1% Gluc          | 2,20992   | $\pm$ 0,04014  | <b>0,96628</b>    | $\pm$ 0,12596  | <b>1,27390</b>    | $\pm$ 0,10520  | <b>1,29848</b>    | $\pm$ 0,07133  |
| Maltose/Trehalose   | 3d H <sub>2</sub> O | 1,00000   | $\pm$ 0,08597  | <b>0,50223</b>    | $\pm$ 0,06565  | <b>5,78319</b>    | $\pm$ 1,11591  | <b>2,16823</b>    | $\pm$ 0,37253  |
| Maltose/Trehalose   | 3d 1% Gluc          | 11,11410  | $\pm$ 0,88921  | 7,86744           | $\pm$ 1,51316  | 10,01655          | $\pm$ 0,32506  | 10,63075          | $\pm$ 0,23120  |
| Mannitol/Sorbitol   | 3d H <sub>2</sub> O | 1,00000   | $\pm$ 0,14658  | <b>2,17018</b>    | $\pm$ 0,16775  | <b>6,08975</b>    | $\pm$ 1,02764  | <b>1,64169</b>    | $\pm$ 0,13941  |

|                   |                     |           |   |          |                  |   |          |                  |   |          |                  |   |         |
|-------------------|---------------------|-----------|---|----------|------------------|---|----------|------------------|---|----------|------------------|---|---------|
| Mannitol/Sorbitol | 3d 1% Gluc          | 1,94865   | ± | 0,11728  | <b>1,08082</b>   | ± | 0,11473  | <b>0,40474</b>   | ± | 0,03851  | <b>1,23619</b>   | ± | 0,19053 |
| Mannose           | 3d H <sub>2</sub> O | 1,00000   | ± | 0,00000  | 0,94430          | ± | 0,13886  | 0,92966          | ± | 0,27849  | 0,50388          | ± | 0,00000 |
| Mannose           | 3d 1% Gluc          | 69,91054  | ± | 5,96842  | 49,01545         | ± | 6,59019  | 69,19863         | ± | 10,96218 | 72,64092         | ± | 6,01991 |
| Methionine        | 3d H <sub>2</sub> O | 1,00000   | ± | 0,25029  | 0,44592          | ± | 0,09190  | 0,63988          | ± | 0,04924  | 0,31793          | ± | 0,12644 |
| Methionine        | 3d 1% Gluc          | 1,32568   | ± | 0,43913  | 0,57804          | ± | 0,17993  | 1,26637          | ± | 0,05002  | 0,28011          | ± | 0,12413 |
| Nicotinic acid    | 3d H <sub>2</sub> O | 1,00000   | ± | 0,21437  | 0,84918          | ± | 0,00000  | 2,13998          | ± | 0,73688  | 1,51796          | ± | 0,24148 |
| Nicotinic acid    | 3d 1% Gluc          | 1,28362   | ± | 0,25260  | 0,75340          | ± | 0,00000  | 1,34130          | ± | 0,00000  | 0,00000          | ± | 0,00000 |
| PEP               | 3d H <sub>2</sub> O | 1,00000   | ± | 0,16102  | 0,63992          | ± | 0,17361  | 0,51031          | ± | 0,00000  | <b>0,33960</b>   | ± | 0,02421 |
| PEP               | 3d 1% Gluc          | 2,62188   | ± | 0,19131  | <b>1,15075</b>   | ± | 0,24228  | <b>1,22862</b>   | ± | 0,13170  | <b>0,88864</b>   | ± | 0,16811 |
| Phenylalanine     | 3d H <sub>2</sub> O | 1,00000   | ± | 0,18527  | 1,47729          | ± | 0,09956  | <b>2,36707</b>   | ± | 0,37814  | 1,45731          | ± | 0,26554 |
| Phenylalanine     | 3d 1% Gluc          | 0,59012   | ± | 0,03339  | 0,40541          | ± | 0,07333  | 0,65422          | ± | 0,03068  | <b>0,44448</b>   | ± | 0,01809 |
| Phosphate         | 3d H <sub>2</sub> O | 1,00000   | ± | 0,03294  | 1,09180          | ± | 0,02865  | <b>1,60256</b>   | ± | 0,05773  | 1,05563          | ± | 0,03283 |
| Phosphate         | 3d 1% Gluc          | 0,92143   | ± | 0,02784  | 0,86755          | ± | 0,07440  | <b>1,07048</b>   | ± | 0,03096  | <b>0,66388</b>   | ± | 0,02434 |
| Proline           | 3d H <sub>2</sub> O | 1,00000   | ± | 0,17741  | 0,83214          | ± | 0,08940  | 1,43309          | ± | 0,18571  | 1,72114          | ± | 0,67394 |
| Proline           | 3d 1% Gluc          | 3,04027   | ± | 0,61525  | 2,71611          | ± | 0,67509  | 6,05161          | ± | 2,47397  | 4,41345          | ± | 1,49930 |
| Putrescine        | 3d H <sub>2</sub> O | 1,00000   | ± | 0,09099  | 1,04416          | ± | 0,05782  | <b>1,55514</b>   | ± | 0,11526  | 0,91353          | ± | 0,16658 |
| Putrescine        | 3d 1% Gluc          | 1,34669   | ± | 0,08215  | 1,42562          | ± | 0,19601  | <b>2,75367</b>   | ± | 0,27714  | <b>1,95100</b>   | ± | 0,21931 |
| Pyruvate          | 3d H <sub>2</sub> O | 1,00000   | ± | 0,19793  | 0,84674          | ± | 0,09162  | 1,86733          | ± | 0,49204  | 0,79855          | ± | 0,21295 |
| Pyruvate          | 3d 1% Gluc          | 0,82747   | ± | 0,18757  | 1,69437          | ± | 0,56558  | 2,68873          | ± | 1,02398  | <b>1,54283</b>   | ± | 0,17617 |
| Ribose            | 3d H <sub>2</sub> O | 1,00000   | ± | 0,08901  | <b>2,89532</b>   | ± | 0,47646  | <b>7,53121</b>   | ± | 0,84522  | <b>3,83584</b>   | ± | 0,22841 |
| Ribose            | 3d 1% Gluc          | 1,56396   | ± | 0,39866  | 1,30448          | ± | 0,36682  | <b>5,39705</b>   | ± | 0,27720  | 2,42773          | ± | 0,04557 |
| Serine            | 3d H <sub>2</sub> O | 1,00000   | ± | 0,23696  | 2,63098          | ± | 0,43753  | <b>3,95164</b>   | ± | 0,96142  | 2,88567          | ± | 0,81569 |
| Serine            | 3d 1% Gluc          | 2,66246   | ± | 0,22807  | 2,49943          | ± | 0,28080  | <b>4,85217</b>   | ± | 0,30888  | 4,08180          | ± | 0,31250 |
| Shikimate         | 3d H <sub>2</sub> O | 1,00000   | ± | 0,12476  | 0,99885          | ± | 0,14720  | 1,07884          | ± | 0,11645  | 0,61772          | ± | 0,13401 |
| Shikimate         | 3d 1% Gluc          | 1,64151   | ± | 0,14675  | 1,49434          | ± | 0,14598  | <b>4,99001</b>   | ± | 0,49762  | <b>3,53058</b>   | ± | 0,57170 |
| Sinapic acid      | 3d H <sub>2</sub> O | 1,00000   | ± | 0,07555  | <b>0,28634</b>   | ± | 0,03719  | <b>0,56844</b>   | ± | 0,02252  | <b>0,36045</b>   | ± | 0,04666 |
| Sinapic acid      | 3d 1% Gluc          | 1,80217   | ± | 0,18615  | <b>1,15181</b>   | ± | 0,08430  | 1,60202          | ± | 0,23241  | 1,64079          | ± | 0,17262 |
| Succinate         | 3d H <sub>2</sub> O | 1,00000   | ± | 0,05350  | <b>0,48447</b>   | ± | 0,02705  | <b>0,63084</b>   | ± | 0,00924  | <b>0,37725</b>   | ± | 0,02197 |
| Succinate         | 3d 1% Gluc          | 1,02282   | ± | 0,02286  | <b>0,59652</b>   | ± | 0,04931  | <b>1,15204</b>   | ± | 0,04599  | 1,12269          | ± | 0,07920 |
| Sucrose           | 3d H <sub>2</sub> O | 1,00000   | ± | 0,26214  | 1,68114          | ± | 0,28699  | 1,05929          | ± | 0,21935  | 0,68504          | ± | 0,12778 |
| Sucrose           | 3d 1% Gluc          | 364,33091 | ± | 14,83086 | <b>196,52803</b> | ± | 24,19438 | <b>232,13892</b> | ± | 4,38618  | <b>248,49943</b> | ± | 9,02416 |
| Threonine         | 3d H <sub>2</sub> O | 1,00000   | ± | 0,11081  | 0,71803          | ± | 0,10683  | 1,05221          | ± | 0,08293  | <b>0,48393</b>   | ± | 0,09250 |
| Threonine         | 3d 1% Gluc          | 10,51747  | ± | 1,29101  | <b>2,83565</b>   | ± | 0,21359  | <b>5,21313</b>   | ± | 0,60944  | <b>3,00453</b>   | ± | 0,75365 |
| Tryptophane       | 3d H <sub>2</sub> O | 1,00000   | ± | 0,14864  | <b>5,89693</b>   | ± | 1,29788  | <b>5,70072</b>   | ± | 1,78984  | <b>4,75927</b>   | ± | 0,95408 |
| Tryptophane       | 3d 1% Gluc          | 1,95015   | ± | 0,29829  | 1,70690          | ± | 0,40780  | <b>2,80356</b>   | ± | 0,14951  | 2,45619          | ± | 0,16116 |
| Tyrosine          | 3d H <sub>2</sub> O | 1,00000   | ± | 0,07805  | <b>5,02713</b>   | ± | 0,84322  | <b>8,04947</b>   | ± | 1,14679  | <b>4,27774</b>   | ± | 0,66826 |
| Tyrosine          | 3d 1% Gluc          | 6,09825   | ± | 0,64077  | <b>3,49045</b>   | ± | 0,36939  | 4,86713          | ± | 0,33100  | <b>3,67880</b>   | ± | 0,20270 |
| Uracil            | 3d H <sub>2</sub> O | 1,00000   | ± | 0,08545  | <b>0,29718</b>   | ± | 0,05309  | <b>0,49191</b>   | ± | 0,08914  | <b>0,49584</b>   | ± | 0,02783 |
| Uracil            | 3d 1% Gluc          | 0,53156   | ± | 0,06622  | 0,42518          | ± | 0,04867  | 0,63944          | ± | 0,19233  | 0,67817          | ± | 0,14277 |
| Valin             | 3d H <sub>2</sub> O | 1,00000   | ± | 0,08619  | <b>1,75490</b>   | ± | 0,12218  | <b>1,99275</b>   | ± | 0,25538  | 1,41134          | ± | 0,18645 |
| Valin             | 3d 1% Gluc          | 2,70260   | ± | 0,07276  | <b>2,00713</b>   | ± | 0,22105  | <b>3,62495</b>   | ± | 0,03335  | 2,71433          | ± | 0,12264 |
